1 **Polycomb repressive complex 2 coordinates with Sin3 histone deacetylase complex**  
2 **to epigenetically reprogram genome-wide expression of *effectors* and regulate**  
3 **pathogenicity in *Magnaporthe oryzae***

4

5 Zhongling Wu<sup>1,§</sup>, Jiehua Qiu<sup>2,§</sup>, Huanbin Shi<sup>2</sup>, Chuyu Lin<sup>1</sup>, Jiangnan Yue<sup>1</sup>, Zhiquan Liu<sup>2</sup>,  
6 Wei Xie<sup>1</sup>, Yanjun Kou<sup>2\*</sup> and Zeng Tao<sup>1\*</sup>

7

8 <sup>1</sup>State Key Lab of Rice Biology, Ministry of Agriculture Key Laboratory of Molecular  
9 Biology of Crop Pathogens and Insects, Institute of Biotechnology, Zhejiang University,  
10 Hangzhou, China.

11 <sup>2</sup>State Key Lab of Rice Biology, China National Rice Research Institute, Hangzhou,  
12 China

13 § These authors contributed equally.

14 \* Correspondence: taozeng@zju.edu.cn (Z.T.), kouyanjun@caas.cn (Y.K.).

15

16

17

18

19 Running head: Reprogramming of *effectors* during *Magnaporthe oryzae*–rice  
20 interaction

21

22

23

24

25

26

27

28

29

30

31 **Abstract**

32 The strict suppression and reprogramming of gene expression are necessary at different  
33 development stages and/or in response to environment stimuli in eukaryotes. In Rice  
34 *Magnaporthe oryzae* pathosystem, *effectors* from pathogen are kept transcriptionally  
35 silenced in the vegetative growth stage and are highly expressed during invasive growth  
36 stage to adapt to the host environment. However, the mechanism of how such *effectors*  
37 are stably repressed in the vegetative stage and its roles during rice blast infection  
38 remain unclear so far. Here, we showed that all subunits of Polycomb Repressive  
39 Complex 2 are required for such repression by direct H3K27me3 occupancy and  
40 pathogenic process in *M. oryzae*. Suppression of polycomb-mediated H3K27me3  
41 causes an improper induction of *effectors* during vegetative growth thus simulating a  
42 host environment. Notably, the addition subunit P55 not only acts as the bridge to  
43 connect with core subunits to form a complex in *M. oryzae*, but also recruits Sin3  
44 histone deacetylase complex to prompt H3K27me3 occupancy for stable maintenance  
45 of transcriptional silencing of the target genes in the absence of PRC1. In contrast,  
46 during invasive growth stage, the repressed state of *effectors* chromatin can be partially  
47 erased during pathogenic development resulting in transcriptional activation of  
48 effectors therein. Overall, Polycomb repressive complex 2 coordinates with Sin3  
49 histone deacetylase complex to epigenetically reprogram genome-wide expression of  
50 *effectors*, which act as molecular switch to memorize the host environment from  
51 vegetative to invasive growth, thus contributing to the infection of rice blast.

52

53

54

55

56

57

58 **Key words: rice blast; PRC2; histone deacetylation; Sin3-HDAC; transcriptional**  
59 **reprogramming**

60

61 **Introduction**

62

63 Organisms need to reprogram gene expression properly in different development stages  
64 or environment stimuli, which suppressing unnecessary genes is the most of important  
65 process (Cavalli and Heard, 2019, Netea et al., 2016). Stable maintenance of repressed  
66 gene expression states is achieved partly by the propagation of specific chromatin  
67 modifications (Cavalli and Heard, 2019). Evolutionary conserved polycomb repressive  
68 complexes (PRC) plays a vital role in such repression and contributes to facultative  
69 heterochromatin (Schuettengruber et al., 2017, Wiles and Selker, 2017, Margueron and  
70 Reinberg, 2011). PRC is involved in various biological processes, including  
71 maintaining cellular and tissue identity in multicellular organisms and regulating phase  
72 transitions in plants (Margueron and Reinberg, 2011, Blackledge et al., 2015). In  
73 mammals and higher plants, there are two main polycomb group complexes, PRC1 and  
74 PRC2 (Lanzuolo and Orlando, 2012). PRC1, including Pc, Ph, and Psc, compacts  
75 chromatin and catalyzes the monoubiquitylation of histone H2A. PRC2, including core  
76 subunits proteins, Ezh (Kmt6), Su(z)12, Esc (Eed) and additional subunits  
77 RbAp48/Nurf55 (P55), catalyzes the methylation of histone H3 at lysine 27 (Wiles and  
78 Selker, 2017, Schuettengruber et al., 2017). The core PRC2 complex is conserved from  
79 *Drosophila* to mammals and higher plants, while the PRC1 complex is not  
80 evolutionarily conserved. Notably, PRC1 has not been identified in fungi so far  
81 (Margueron and Reinberg, 2011, Ridenour et al., 2020).

82

83 In the fungi kingdom, disruption of PRC usually reprograms genome-wide gene  
84 expression, leading to abnormal growth and reduced pathogenicity (Ridenour et al.,  
85 2020, Wiles and Selker, 2017). In *Fusarium graminearum*, deletion of core subunits of  
86 PRC2 resulted in the complete loss of H3K27me3 modification, ~2,500 genes up-  
87 regulation, as well as severe defects in growth and pathogenicity (Connolly et al., 2013).  
88 In *Magnaporthe oryzae*, deletion of *KMT6* eliminated all H3K27me3 modifications,  
89 resulted in a decrease in sporulation and highly reduced pathogenicity in wheat and  
90 barley (Pham et al., 2015). In *Neurospora crassa*, loss of core subunits also abolished

91 all H3K27me3 modification, but only accompanied by slight growth defects (Jamieson  
92 et al., 2013). In the yeast *Cryptococcus neoformans*, loss of *EZH2*, *Eed1* or additional  
93 subunit *Bnd1* removed all H3K27me3 modification, while loss of the novel accessory  
94 component *Ccc1* resulted in regional reduction and relocalization of H3K27me3  
95 modification on the chromosome (Dumesic et al., 2015). In symbiotic fungus *Epichloe*  
96 *festucae*, H3K27me3 coupled with H3K9me3 controls expression of symbiosis-specific  
97 genes, such as genes related to alkaloid bioprotective metabolites (Chujo and Scott,  
98 2014). Although many studies have been done on the PRC complex in fungi, how the  
99 PRC2 effectively regulates gene expression and stably maintains the repressive  
100 H3K27me3 modification on the target chromatin in the absence of PRC1 remains  
101 largely unclear (Ridenour et al., 2020, Wiles and Selker, 2017).

102

103 During plant–pathogen interaction, pathogens have evolved multiple layer of  
104 strategies to invade host effectively, including secreting effectors to modulate rice  
105 immunity and ensure progressive infection (Fouche et al., 2018). Reprogramming the  
106 expression of the *effectors* by the pathogen is often used as an effective strategy to  
107 invade the host (Fouche et al., 2018). In addition, recent studies showed that  
108 transcriptional polymorphism with *effectors* contributes to the adaption of pathogenic  
109 microbes to environmental changes and co-evolution with host (Fouche et al., 2018).  
110 In the soybean root rot pathogen *Phytophthora sojae*, occupancy of H3K27me3 at  
111 *Avirulence* gene *Avr1b* leads to transcriptional silencing and fails to induce the *Rps1b*  
112 mediated disease resistance (Wang et al., 2020). However, in the vegetative growth  
113 stage, how to maintain the stable suppression of expression of *effectors* remains unclear.

114

115 Rice blast, caused by *M. oryzae*, is the most devastating disease of rice and  
116 threatens food security worldwide. In *M. oryzae*–rice interaction, the majority of the  
117 *effectors* are kept transcriptional silencing or expressed relatively low in the vegetative  
118 growth stage (Dong et al., 2015, Sharpee et al., 2017, Jeon et al., 2020), but are de-  
119 repressed during invasive growth stage (Dong et al., 2015, Jeon et al., 2020). During  
120 preparing our manuscript, a really good study found that H3K27 dynamics associate

121 with altered transcription of *in planta* induced genes in *M. oryzae* (Zhang et al., 2021).  
122 Here, we not only find that histone modification H3K27me3 is required for genome-  
123 wide transcriptional silencing of *effectors* during vegetative growth stage in *M. oryzae*,  
124 but also present the detailed and novel mechanism beyond these findings. First, all  
125 subunits of PRC2, are required for H3K27me3-meditating polycomb silencing on the  
126 *effectors* and pathogenicity, which the addition subunit P55 acts as the bridge to connect  
127 with the core subunits to form a complex in *M. oryzae*. Furthermore, P55 recruits Sin3  
128 histone deacetylase complex to coordinate with PRC2 and prompts H3K27me3  
129 occupancy on the target chromatin. During invasive growth stage, the repressed  
130 chromatin state on the *effectors* can be partially “erased”, resulting in the transcriptional  
131 activation of *effectors*. In addition, we also reveal the important role of Sin3 histone  
132 deacetylase complex in transcriptional reprogramming the genome-wide expression of  
133 *effectors*, as well as in pathogenicity.

134

## 135 **Results**

### 136 **Kmt6, as well as other PRC2 subunits, is indispensable for H3K27me3** 137 **modification in *M. oryzae***

138

139 In *M. oryzae*, Kmt6 (*MGG\_00152*) was reported as the writer of H3K27me3  
140 modification which is associated with altered transcription of *in planta* induced genes  
141 in *M. oryzae* (Pham et al., 2015, Zhang et al., 2021). However, how H3K27  
142 trimethylation achieve stably transcriptional silencing of *effectors* during vegetative  
143 growth remains largely unknown. To answer this question,  $\Delta kmt6$  was created in the  
144 wild-type (WT) *M. oryzae* strain B157. As reported, the expression levels of  
145 representative *effectors* during vegetative growth stage exhibited significant increased  
146 expression levels than that of the WT (Figure 1a)(Khang et al., 2010, Mosquera et al.,  
147 2009, Sharpee et al., 2017). To verify whether the increased transcriptional expression  
148 of *effectors* would enhance accumulation and secretion of effectors during vegetative  
149 growth stage, the *BAS4-GFP* construct was introduced into the  $\Delta kmt6$  strain. As shown  
150 in the Figure 1b, the Bas4-GFP signal was clearly evident in the conidia, and the apical

151 and subapical regions of the hyphae of the  $\Delta kmt6$  mutant, but was not detectable in  
152 those of the WT. These results indicated that removal of H3K27me3 modification leads  
153 to untimely expression of *BAS4* during vegetative growth stage similar with that found  
154 naturally during invasive growth stage (Figure 1b).

155

156 Polycomb-group genes were first identified in *Hox* regulation in *Drosophila* and  
157 are usually assembled with Polycomb repressive complex 1 (PRC1) and PRC2  
158 (Blackledge et al., 2015, Ridenour et al., 2020). To identify the candidate PRC1 and  
159 other PRC2 subunits in *M. oryzae*, BLASTp was used to search for the orthologs from  
160 *M. oryzae* 70-15 genomes (taxid: 242507) with the query sequences from *Neurospora*  
161 *crassa*, *Arabidopsis thaliana*, and *Drosophila melanogaster* (Table S1). Three unique  
162 PRC2 core subunits, Kmt6 (MGG\_00152), Eed (MGG\_06028), Suz12 (MGG\_03169),  
163 and one additional subunit P55 (MGG\_07323) were obtained, while no PRC1 subunits  
164 was hit even by low stringency BLAST in *M. oryzae* (Table S1, Figure S1).

165

166 To investigate whether Kmt6, Eed, Suz12 and P55 form a complex, we first fused  
167 these proteins with GFP and examined their subcellular localization in *M. oryzae*. As  
168 shown in the Figure 2a, all these subunits were co-localized Hoechst-stained nuclei,  
169 suggesting that these components may form a complex in the nucleus like PRC2 in  
170 other species (Figure 2a). Then, yeast two-hybrid assay was conducted to test whether  
171 these subunits are physically associated *in vitro*. *KMT6*, *Suz12*, *Eed* and *P55* were  
172 cloned to the prey and bait vectors respectively. These results showed that the additional  
173 subunit P55 interacts with other three core subunits, and Kmt6 interacts with Eed in the  
174 yeast cells (Figure 2b). Furthermore, co-immunoprecipitation assays with strains  
175 expressing *Eed-GFP* and *Kmt6-Flag*, *P55-GFP* and *Kmt6-Flag*, *P55-GFP* and *Suz12-*  
176 *Flag*, *P55-GFP* and *Eed-Flag* respectively further confirmed these interactions *in vivo*  
177 (Figure 2c-f). Taken together, these results suggested that Kmt6, Eed, Suz12 and P55  
178 form a complex, and P55 serves as the bridge to connect the PRC2 components.

179

180 To explore whether Eed, Suz12, and P55 are indeed required for H3K27me3  
181 modification, deletion mutants of *Suz12*, *Eed* and *P55* were created by homolog  
182 recombination in the WT. Subsequently, the protein levels of histone lysine methylation  
183 were detected with specific antibodies using Western blotting assay. The levels of  
184 H3K27me3 were almost undetectable in the  $\Delta kmt6$ ,  $\Delta eed$  and  $\Delta suz12$  mutants, while  
185 the level of H3K27me3 in the  $\Delta P55$  still retained half level of the WT (Figure 2f), which  
186 indicated that P55 is not essential for H3K27me3 modification as the core subunits.  
187 Furthermore, the decreased levels of H3K27me3 in the mutants were completely  
188 restored in the complementary strains respectively (Figure 2f). Meanwhile the levels of  
189 H3K4me3 and H3K36me3 had no obvious change in all aforementioned strains by  
190 comparing with that of WT (Figure S2). We conclude that Kmt6, Suz12 and Eed are  
191 fully and specifically required for H3K27me3 modification, while P55 partially  
192 contributes to H3K27me3 modification.

193

#### 194 **All PRC2 subunits are required for mycelia growth, conidiation, and** 195 **pathogenicity in *M. oryzae***

196

197 To investigate the function of PRC2 complex in *M. oryzae*, mycelia growth and  
198 conidiation were assessed in the  $\Delta kmt6$ ,  $\Delta eed$ ,  $\Delta suz12$ ,  $\Delta p55$ , as well as their  
199 complementary strains. Similar with the  $\Delta kmt6$ ,  $\Delta suz12$  and  $\Delta eed$  strains exhibited  
200 decreased mycelia growth and dramatically reduced conidiation, which had similar  
201 phenotype with recent report (Zhang et al., 2021) (Figure 3a-c). Notably,  $\Delta p55$  had  
202 more severe phenotype in the mycelia growth (Figure 3a-b), suggesting that P55 had  
203 wider functions beside for acting as the bridge in the PRC2 complex. These results  
204 indicated that H3K27me3 is required for the mycelia growth and conidiation in *M.*  
205 *oryzae*.

206

207 To analyse the function of PRC2 components in pathogenicity, conidia of the WT,  
208 mutant and complementary strains were collected and then inoculated on the  
209 susceptible rice cultivar CO39 (*Oryza sativa*). As the number of conidia from mutants

210 highly reduced (15-25% of the WT) (Figure 3c), low concentration of conidia ( $5 \times 10^4$ /  
211 mL) were used in the rice seedling infection assay. Compared with WT, which caused  
212 the characteristic spindle-shaped blast lesions with grey centres, mutant strains formed  
213 relative fewer and restricted lesions (Figure 3d-e). To further decipher these  
214 observations, the appressoria formation on the inductive hydrophobic surface and rice  
215 sheath were investigated. Although no obvious change in appressoria formation at 24  
216 hpi (hour post inoculation) was found in the mutant strains (data not shown), the  
217 invasive growth displayed significant difference between the mutants and WT (Figure  
218 3f). Nearly 90% appressoria from the WT strain successfully penetrated the rice sheath,  
219 while only 60% appressoria from the deletion mutants were capable of penetration  
220 (Figure 3f) at 40 hpi. Moreover, the formation of secondary invasive hyphae in the  
221 mutant strains was less than that of WT. These results indicated that H3K27me3 is  
222 necessary for penetration and invasive hyphal growth.

223

224 **Core subunits of PRC2, together with P55, suppress genome-wide gene expression,**  
225 **including *effectors*, at vegetative growth stage**

226

227 To explore the roles of H3K27me3 in the transcriptional regulation in *M. oryzae*, high-  
228 throughput sequencing (RNA-seq) was performed using the vegetative mycelia with  
229 three biological repeats. As H3K27me3 always contributes to transcriptional silencing  
230 on target genes, the mutant strains would be expected to enrich with high ratio of de-  
231 repressed genes. As expected, totally 19.2%, 18.6%, 20.1% and 15.4% of genome-wide  
232 genes were identified as up-regulated genes (UEG) with equal or greater than 2-fold  
233 change ( $\text{Log}_2 > 1$ ,  $P < 0.05$ ), while only 5.3%, 6.0%, 8.8% and 3.3% of genes were  
234 identified as down-regulated genes (DEG) in the  $\Delta kmt6$ ,  $\Delta eed$ ,  $\Delta suz12$  and  $\Delta p55$  strains  
235 respectively ( $\text{Log}_2 < -1$ ,  $P < 0.05$ ) (Figure 4a). As the core subunits of PRC2,  $\Delta kmt6$ ,  $\Delta eed$   
236 and  $\Delta suz12$  shared 80-86% overlaps (2144 genes) in their UEG (Figure S3a). The high  
237 ratio of co-regulated genes further indicated that Kmt6, Eed and Suz12 function in the  
238 same complex. Moreover, the predominant roles of de-repressed regulation in the  
239 mutants of core subunits suggested that H3K27me3 modification played conserved



240 roles as transcriptional repressors in *M. oryzae* (Figure 4a). Although P55 was thought  
241 as additional subunit which was different from other three core subunits, there was no  
242 obvious difference in the gene sets between the  $\Delta kmt6$ -UEG and  $\Delta p55$ -UEG strains  
243 (P=0) (Figure S3b). These results further confirmed that core subunits of PRC2,  
244 together with P55, function in the same complex and regulate similar biological  
245 processes.

246

247 To explore the detailed biological process involved in PRC2, Gene Ontology (GO)  
248 analysis was conducted with  $\Delta kmt6$ -UEG. Biological process as “interaction with host  
249 *via* secreted protein” were significantly enriched (Figure S3c). This was consistent with  
250 our hypothesis that H3K27me3 modification contributes to suppress the expression of  
251 *effectors* at vegetative growth stage. To further address this question, gene sets of  
252 putative genome-wide *effectors*, including 134 (only 124 *effectors* had reads in our  
253 RNA-seq) and 247 (only 246 *effectors* had reads in our RNA-seq) *effectors* from two  
254 different literatures respectively, were extracted for further analysis (Sharpee et al.,  
255 2017, Dong et al., 2015). Compared with the WT, nearly 51.6% (64/124) and 42.7%  
256 (105/246) *effectors* exhibited significantly increased expression in the  $\Delta kmt6$  strain  
257 (Figure 4b and S4). To preclude the specificity of strain background, similar analysis  
258 was performed with the  $\Delta kmt6$  mutant in the Guy11 background. The ratio of up-  
259 regulated *effectors* in the  $\Delta kmt6$  either in B157 or Guy11 background were significantly  
260 enriched with similar tendency (Figure 4b and S5a-c). We concluded that H3K27me3  
261 is specifically required in the suppression of *effectors* during vegetative growth stage  
262 in *M. oryzae*.

263

264 In addition, loss of H3K27me3 modification not only activated the expression of  
265 *effectors*, but also activated some infection-specific genes such as those encoding  
266 cutinases and cell-wall degrade enzymes, which indicated that the absence of  
267 H3K27me3 could partially mimic host-derived signal. Therefore, we compared the  
268 gene sets between  $\Delta kmt6$ -UEG and UEG from 36 hpi and 72 hpi *in planta* from  
269 published RNA-seq respectively (Jeon et al., 2020). The results showed that 30.1%

270 (820/2654) of 36 hpi-UEG and 33.1% (778/2353) 72 hpi-UEG were significantly  
271 overlapped with  $\Delta kmt6$ -UEG (Figure S6a-b).

272

### 273 **H3K27me3 occupancy is associated with increased transcription in the PRC2** 274 **mutants**

275

276 To further depict whether H3K27me3 directly deposits on the chromatin of *effectors*,  
277 we attempted to map the genome-wide H3K27me3 occupancy using chromatin  
278 immunoprecipitation assay followed by high-throughput sequencing (ChIP-seq) in the  
279 WT and  $\Delta kmt6$  strains. The intensity of H3K27me3 occupancy in the  $\Delta kmt6$  mutant  
280 was barely detectable (Figure S7a), which was consistent with the role of Kmt6 as the  
281 H3K27me3 writer in *M. oryzae*. Compared with the  $\Delta kmt6$  mutant, totally 1082  
282 significant peaks were identified in the WT ( $\text{Log}_2 > 1$ ,  $P < 0.05$ ), which were  
283 corresponded to 1033 genes and mainly spread within gene bodies (Supplemental  
284 Figure 7a-b). To verify whether  $\Delta kmt6$ -UEG were directly associated with the loss of  
285 H3K27me3 occupancy, the gene sets between  $\Delta kmt6$ -UEG under low or high threshold  
286 and H3K27me3-marked genes were compared. With low threshold ( $\text{Log}_2 > 1$ ,  $P < 0.05$ ),  
287 23.5% (645 of 2743) of  $\Delta kmt6$ -UEG were marked with directly H3K27me3 occupancy  
288 (Figure S7c). while with stringent threshold ( $\text{Log}_2 > 3$ ,  $P < 0.05$ ), 40.1% (532 of 1327)  
289 of  $\Delta kmt6$ -UEG were marked with H3K27me3 (Figure S7c). Together, the de-repressed  
290 genes in the  $\Delta kmt6$  are highly correlated with the absence of H3K27me3 occupancy.

291

292 Next, GO analysis was conducted with H3K27me3-occupancy genes. Biological  
293 process “interaction with host via protein secreted” were highly enriched (Figure 4c),  
294 similar with the results from the  $\Delta kmt6$ -UEG. Significantly, 26.7% (33 of 124) and 19.9%  
295 (49 of 246) of effectors were directly marked with H3K27me3 modification (Figure 4d  
296 and S7d). The chromatin of representative *effectors* as *BAS3*, *BAS4*, *SPD5* and *SPD10*  
297 enriched with H3K27me3 modification in the WT but nearly undetectable in the  $\Delta kmt6$   
298 mutant (Figure 4e). Consistently, the increased expression of examined *effectors*  
299 accompanied with almost undetectable H3K27me3 level in the  $\Delta kmt6$  with ChIP-qPCR

300 assay (Figure 1a and 4f). In addition, gene sets of 36 hpi-UEG and 72 hpi-UEG *in*  
301 *planta* were also highly marked with H3K27me3 (Figure S6a-b) and the chromatin state  
302 of four cutinases loci was validated with ChIP-qPCR (Figure S7e). These results further  
303 indicated that the H3K27me3 modification directly associates with transcriptional  
304 silencing on the *effectors* and infection-specific genes.

305

### 306 **P55 recruits Sin3 histone deacetylase complex to form a co-suppression complex**

307

308 How PRC2 performs stable transcriptional silencing on the target chromatin in the  
309 absence of PRC1 remains unclear (Ridenour et al., 2020, Margueron and Reinberg,  
310 2011). As a chromatin assembling factor and histone-binding WD40-repeat proteins,  
311 ortholog of the additional subunit P55 was reported to associate with other co-  
312 suppression complex to conduct transcriptional silencing in other organisms (Mehdi et  
313 al., 2016, Gu et al., 2011). As the additional subunit of PRC2 in *M. oryzae*, P55 acts as  
314 the bridge to connect other core subunits together and  $\Delta p55$  exhibited more severe  
315 phenotype than other mutants in our experiments. We postulated that P55 may recruit  
316 other co-suppression machinery to help PRC2 to stably maintain polycomb silencing.  
317 To address this possibility, P55 was fused to the bait vector and putative histone  
318 deacetylases were cloned individually in the prey vector for yeast-two-hybrid assays.  
319 As a result, we found that P55 interacted with four components of Sin3 histone  
320 deacetylases complex in yeast two-hybrid assays (Figure 5a). Sin3 histone deacetylases  
321 complex has been well characterized in yeast and other organisms (Huang et al., 2019,  
322 Grzenda et al., 2009, Adams et al., 2018), which the core components of Sin3 histone  
323 deacetylase complex includes histone deacetylase Hos2 (MGG\_01633)(Lee et al.,  
324 2019), major regulatory protein Sin3 (MGG\_13498), other subunits Sap18  
325 (MGG\_05680) and Sap30 (MGG\_11142) in *M. oryzae*. Moreover, Sap30 interacted  
326 with other three components as Hos2, Sin3 and Sap18 in yeast which indicated that  
327 these components function in the same complex (Figure S8a). Coimmunoprecipitation  
328 assays with the strains expressing *P55-GFP/Sin3-Flag*, and *P55-GFP/SAP18-Flag*  
329 further confirmed that P55 is physically associated with Sin3-HDAC *in vivo* (Figure

330 5b-c).

331

332 To explore the function of Sin3-HDAC in *M. oryzae*, the deletion mutants of *Sin3*,  
333 *Sap18* and *Sap30* were created. Among these mutants,  $\Delta sin3$  exhibited severe  
334 phenotype similar to  $\Delta p55$ , including decreased fungal growth, severely reduced  
335 conidiation, as well as highly reduced pathogenicity (Figure 5d-h). To investigate  
336 whether Sin3-HDAC contributes to the histone deacetylation activity *in vivo*, the global  
337 levels of histone acetylation were checked in the WT and  $\Delta sin3$  strains. Among the  
338 examined acetylated residues, at least the levels of H3K4ac, H3K27ac and H4K5ac  
339 were significantly increased in the  $\Delta sin3$  strain than that of WT (Figure 6a and S8b).  
340 The increased level of H3K4ac in the  $\Delta sin3$  was further confirmed by ChIP-seq assay.  
341 The global H3K4ac occupancy in the  $\Delta sin3$  was significantly increased than that of WT,  
342 which further confirmed that Sin3-HDAC has histone deacetylation activity in *M.*  
343 *oryzae* (Figure S8c). As loss of histone deacetylation would accompany with genome-  
344 wide gene activation, we conducted RNA-seq with total RNA extracted from the  $\Delta sin3$   
345 and WT strains. In the vegetative growth stage, deletion of *Sin3* dramatically altered  
346 the expression of nearly 38% of genome-wide genes compared with WT. Totally, 3049  
347 genes were up-regulated ( $\text{Log}_2 > 1$ ,  $P < 0.05$ ), and 1454 genes were down-regulated  
348 ( $\text{Log}_2 < -1$ ,  $P < 0.05$ ) which implied that *Sin3* also acts as a transcriptional repressor  
349 similar with P55 and Kmt6 (Figure 6b). Based on these results, we conclude that Sin3-  
350 HDAC contributes to histone deacetylation activity and acts as a transcriptional  
351 repressor to regulate genome-wide gene expression in *M. oryzae*.

352

### 353 **Sin3-HDAC co-operates with PRC2 to prompt transcriptional repression on the** 354 **target genes**

355

356 To explore the transcriptional correlation between Sin3-HDAC and PRC2, the  
357 transcriptional profiles of the  $\Delta sin3$  and  $\Delta kmt6$  strains were compared. A total of 1489  
358 genes which were 54.3% of  $\Delta kmt6$ -UEG and 48.8% of  $\Delta sin3$ -UEG were significantly  
359 overlapped ( $P=0$ ) (Figure 6c). To further address whether Sin3-HDAC contributes to

360 H3K27me3-mediated transcriptional silencing, we investigated whether  $\Delta sin3$ -UEG  
361 are enriched with H3K27me3 occupancy. The results showed that with lower stringent  
362 threshold ( $\text{Log}_2 > 1$ ,  $P < 0.05$ ), 16.2% (495 of 3049) of  $\Delta sin3$ -UEG were occupied with  
363 H3K27me3 modification. While with higher stringent threshold ( $\text{Log}_2 > 3$ ), 26.8% (396  
364 of 1478) of  $\Delta sin3$ -UEG were directly associated with H3K27me3 occupancy (Figure  
365 6d). Meanwhile, enhanced H3K4ac and H4K5ac levels were also observed in the  
366  $\Delta kmt6$  and other PRC2 deletion mutants (Figure S8d). These results suggested that  
367 Sin3-mediated histone deacetylation contributes to PRC2-mediated transcriptional  
368 silencing on the target genes.

369

370 Next, GO analysis was conducted with  $\Delta sin3$ -UEG. The term of “interaction with  
371 host via protein secreted” were highly enriched (Figure S9), which was similar with  
372 the results from RNA-seq in the  $\Delta kmt6$  strain, indicating that Sin3-HDAC and PRC2  
373 may coordinately regulate the expression of *effectors*. Therefore, the putative effectome  
374 that includes 124 and 246 predicted members were further investigated in the  $\Delta sin3$ -  
375 UEG (Dong et al., 2015, Sharpee et al., 2017). The results showed that 49.2% (61 of  
376 124, 121/246) predicted *effectors* exhibited significantly increased expression in the  
377  $\Delta sin3$  strain (Figure 6e). To verify these results from RNA-seq analysis, RT-qPCR was  
378 performed with three independent repeats in the WT and  $\Delta sin3$  strains. Consistently,  
379 the expression of the *BASs* and *SPDs* in  $\Delta sin3$  were significantly de-repressed in the  
380 vegetative growth stage (Figure 6f). In addition, a precocious and significant induction  
381 of *BAS4-GFP* signal was found in the conidia and vegetative hyphae of  $\Delta sin3$ , thus  
382 indicating that deletion of *Sin3* leads to Bas4 accumulation and secretion during the  
383 vegetative growth stage (Figure S10).

384

385 Taken together, these results conclude that P55 recruits Sin3-HDAC as a co-  
386 repressor complex to maintain stably transcriptional silencing on the target genes,  
387 including a large scale of *effectors*, during vegetative growth in *M. oryzae*.

388

389 **H3K27me3 modification is “erased” from the chromatin of *effectors* loci during *M.***

## 390 ***oryzae*–rice interaction**

391 To address whether the activated expression of *effectors* during infection stage is  
392 associated with reduced H3K27me3 occupancy, we attempted to conduct ChIP-qPCR  
393 to check H3K27me3 enrichment on chromatin of the *effectors* as *BAS3*, *BAS4*, *SPD5*  
394 and *SPD10* using *in vivo* infected rice leaves with the WT strain. The results showed  
395 that expression of four tested *effectors* was significantly induced from 24 hpi to 72 hpi  
396 (Figure 7a). Subsequently, 72 hpi-infection leaves were collected for ChIP assay.  
397 Compared with the mycelia, the relative H3K27me3 abundance of 72 hpi-infection  
398 leaves dramatically reduced at the chromatin regions of *BAS3*, *BAS4* and *SPD5*, except  
399 *SPD10*, which indicated that the activated expression of *effectors* would be partially  
400 caused by removing of H3K27me3 modification (Figure 7b).

401

## 402 **Discussion**

403

404 In this study, we have revealed how H3K27me3 modifies the expression of genome-  
405 wide *effectors* and contributes to infection of *M. oryzae*. Suppression of H3K27me3  
406 improperly activated the expression of *effectors* in the vegetative growth stage, as well  
407 as highly decreased pathogenicity. We also revealed a new mechanism that the  
408 additional subunit P55 acts as the bridge to connect core subunits to form a complex  
409 and recruits Sin3-HDAC to prompt H3K27me3 occupancy on the *effectors*, therefore  
410 stably maintain polycomb silencing in the absence of PRC1. During invasive growth  
411 stage, the repressed chromatin state on *effectors* is partially “erased”, subsequently the  
412 expression of *effectors* is activated to promote the infection of *M. oryzae*.

413

414 Epigenetic modification was correlated with genome plasticity and stability, help  
415 pathogen effective adaption to host environments (Chadha and Sharma, 2014, Wang et  
416 al., 2020, Cavalli and Heard, 2019). In *M. oryzae*, epigenetic modification as histone  
417 (de)methylation and (de)acetylation have been extensively explored in different  
418 biological processes such as infection structure morphogenesis, developmental  
419 transition and autophagy. Histone deacetylases Tig1 and Hos2 regulate infectious

420 growth and asexual development in *M. oryzae* (Ding et al., 2010, Lee et al., 2019).  
421 H3K4 methyltransferase Set1 contributes to appressorium formation, conidiation and  
422 pathogenicity with transcriptional activation on the infection-related genes (Pham et  
423 al., 2015). Histone acetyltransferase Gcn5 negatively regulates light-induced  
424 autophagy and conidiation through acetylated the autophagy protein Atg7 (Zhang et al.,  
425 2017). *MoSNT2* plays key roles in infection-associated autophagy through recruiting  
426 histone deacetylase complex on the target chromatin (He et al., 2018). Recently, Zhang  
427 et al. elucidated that H3K27 dynamics associate with altered transcription of *in planta*  
428 induced genes, including *effectors*, in *M. oryzae* (Zhang et al., 2021). In our study, we  
429 found that all core subunits of PRC2, together with the additional subunit P55, are  
430 required for H3K27me3-mediated polycomb silencing on the *effectors* in the  
431 vegetative growth stage and pathogenicity. Our results also revealed that histone  
432 modification H3K27me3, coordinately mediated by PRC2 and Sin3 histone  
433 deacetylase complex, directly suppresses most of the genome-wide *effectors*  
434 expression. Previous studies suggested that pathogen *effectors* are rapidly evolved and  
435 especially distributed in regions with high genome plasticity. In *M. oryzae*, *effectors* do  
436 not have common motifs or conserved *cis*-elements that contribute to their adaptability  
437 to host environment (Sanchez-Vallet et al., 2018, Dong et al., 2016). Thus, H3K27me3  
438 seems to preferentially modify the poorly conserved or newly evolved *effectors* to  
439 “guard” the genome through transcriptional silencing (Dong et al., 2015, Sanchez-  
440 Vallet et al., 2018, Fouche et al., 2018). Whenever necessary, such as in response to the  
441 host environment, fungal pathogens redistribute H3K27me3 and evoke transcriptional  
442 activation, then the activated *effectors* help the pathogens to better adapt to and  
443 colonize their host (Fouche et al., 2018).

444

445 Polycomb silencing has been extensively studied in multicellular organisms, which  
446 is conserved from *Drosophila* to mammals and higher plants, as well as in the fungi  
447 kingdom (Margueron and Reinberg, 2011, Ridenour et al., 2020, Wiles and Selker,  
448 2017, Schuettengruber et al., 2017). The core subunits Kmt6, Suz12 and Eed are  
449 necessary for H3K27me3 modification and transcriptional silencing (Wiles and Selker,

450 2017). However, the role of *P55*, the additional subunit of PRC2, remains obscure in  
451 fungi. In *F. graminearum*, the homolog of subunit p55 is not involved in H3K27me3  
452 modification (Ridenour et al., 2020). In *N. crassa*, *P55 (NPF)* is critical for H3K27me3  
453 in a region-dependent manner (Jamieson et al., 2013). In our research, we found that  
454 *P55* plays a critical role in H3K27me3-mediated transcriptional silencing in *M. oryzae*.  
455 First, *P55* acts as the bridge to connect three core components together. Second,  
456 disruption of *P55* largely reprograms gene expression, which significantly overlaps  
457 with those of  $\Delta kmt6$  and is directly associated with H3K27me3 occupancy. Third, *P55*  
458 recruits Sin3-HDAC to form the co-suppression complex with PRC2.

459

460 The Sin3-HDAC corepressor complex is usually associated with a large number of  
461 DNA-binding transcription factors or corepressors to achieve specific and timely  
462 regulation of local chromatin and transcription (Grzenda et al., 2009). In Sin3 histone  
463 deacetylase complex, Sap30 serves as the bridge and stabilizing molecule and Sap18  
464 also involves in the apoptosis and splicing associated protein (ASAP) complex (Adams  
465 et al., 2018, Grzenda et al., 2009, Julia I. Qüesta, 2016). In our study, we found that  
466 *P55* recruits Sin3 histone deacetylase complex to form co-suppression complex.  
467 Furthermore, Sin3 functions as a transcriptional repressor and participates in the  
468 *effectors*-related biological process similar to PRC2. All these results suggested that  
469 Sin3-HDAC would promote H3K27me3 occupancy and facilitate PRC2 machinery in  
470 stably maintaining condensed chromatin status and achieving gene silencing  
471 coordinately. In addition, it is possible that Sin3-associated transcription factors or  
472 corepressors help H3K27me3 recruitment properly (Adams et al., 2018). This finding  
473 not only provides a plausible explanation that PRC2 could stably maintain  
474 transcriptional silencing in the absence of PRC1, but also elucidates the molecular clue  
475 of transcription output caused by crosstalk between histone methylation and  
476 (de)acetylation in *M. oryzae*.

477

478 Establishment and maintenance H3K27me3 to local chromatin depends on histone  
479 “reader” and series of *trans/cis*-regulatory factors which act in corporate or alone



480 (Kassis and Brown, 2013, Xiao et al., 2017). One of the best example of epigenetically  
481 reprogramming is regulation of floral repressor *Flowering Locus C (FLC)* under  
482 vernalization (winter cold exposure) in model plant *Arabidopsis* (Luo and He, 2020).  
483 In our study, we found that the silenced effectors would be de-repressed with reduced  
484 H3K27me3 occupancy during invasive growth stage. Consistent with *FLC* as  
485 molecular switch to “remember” vernalization in *Arabidopsis* (Luo and He, 2020),  
486 transcriptional reprogramming of some specific *effectors* in *M. oryzae* may act as the  
487 molecular switch to “remember” the host environment. However, it is still unknown  
488 how the repressed chromatin is “erased” and how the activated state is established  
489 during invasive growth stage. Given the destined *effectors*, it is worthy to further  
490 elucidate these detailed mechanisms.

491

## 492 **Materials and Methods**

### 493 **Fungal strains and culture conditions**

494

495 The *M. oryzae* WT strain B157 and Guy11 were used as background strain to obtain  
496 transformants in this study, which were kind gifts from the Indian Institute of Rice  
497 Research (Hyderabad, India). All the WT in this study is B157, except for those marked  
498 with Guy11. For growth assessment of *M. oryzae*, strains were grown on the prune agar  
499 medium (PA) for 7 d (Kou et al., 2017). For conidiation, strains were grown on CM  
500 medium at 28°C in the dark for 2 d, followed by growth under continuous lights for 5  
501 d.

502

### 503 **Plasmid construction**

504

505 To create the deletion mutants of *KMT6*, *Eed*, *Suz12*, *P55*, *Sin3*, *Sap18* and *Sap30*, the  
506 standard one-step gene replacement strategy was used in this study. Briefly,  
507 approximate 1-kb of 5'UTR and 3'UTR regions were amplified and ligated sequentially  
508 to the flanking of *Hygromycin*, *Sulf* or *Bar* gene cassette in the *pFGL821* (Addgene,  
509 58223), *pFGL820* (Addgene, 58222) or *pFGL822* (Addgene, 58225) respectively (Kou  
510 et al., 2017). The sequences of plasmids were confirmed by sequencing and  
511 subsequently introduced into the B157 strain by *Agrobacterium tumefaciens* mediated

512 transformation (ATMT). To generate the localization and complementary vectors, the  
513 *eGFP* and *TrpC* terminator were cloned to *pFGL820* to obtain *pFGL820-GFP-TrpC*  
514 terminator. The fragments containing about 1.5-kb of promoter and coding region were  
515 amplified (primers listed in Table S2) and then cloned to *pFGL820-GFP-TrpC*  
516 terminator. After conformed by sequencing, the resultant plasmids were introduced into  
517 corresponding deletion mutants respectively by ATMT.

518

519 To generate the constructs of *pRP27-KMT6-Flag*, *pRP27-Suz12-Flag* and *pRP27-*  
520 *P55-Flag* for co-immunoprecipitation assay, the coding sequence were cloned to  
521 *pFGL822-pRP27-Flag* or *pFGL820-pRP27-eGFP*. The confirmed plasmids were  
522 introduced into deletion mutants respectively by ATMT. Primers used in the  
523 experiments were listed in Table S2.

524

### 525 **Live cell imaging and image processing**

526

527 The CM cultivated hypha were stained with 100 µg/mL Hoechst 33342 (Sigma, 14533)  
528 for 20 min to visualize nuclei. Live cell epifluorescence microscopy imaging was  
529 performed with LSM700 (CarlZeiss Inc.), using the requisite conditions established for  
530 detecting GFP or Hoechst signals. Image processing was performed using image J  
531 (<http://fiji.sc/wiki/index.php/Fiji>). These experiments were conducted with two  
532 independent repeats.

533

### 534 **Appressorial formation assay**

535

536 For appressoria formation assay, conidia were harvested from 7-d-old cultures and  
537 resuspended in sterile water at a concentration of 10<sup>5</sup> conidia per mL. 10 µL droplets of  
538 the conidial suspension were inoculated on the hydrophobic plastic cover slips and  
539 incubated in high humidity at room temperature (Kou et al., 2017). The appressoria  
540 were quantified at 24 hpi. Photographs were taken with an Olympus BX53 wide field  
541 microscope equipped with bright field optics.

542

### 543 **Rice seedling and rice sheath infection assay**

544

545 Rice seedling infection assays were performed as described with 5x10<sup>4</sup>/ mL conidial

546 suspension (Kou et al., 2017). Disease symptoms of infection assays were assessed on  
547 7 dpi. The infection assays were repeated three times. For the invasive hyphal  
548 development assay, 21-d-old healthy rice seedlings (CO39) were used for sheath  
549 preparation. Conidial suspension was inoculated into the rice sheath and incubated in  
550 the growth chamber with the photoperiod of 16-h light and 8-h dark at 25°C. The  
551 inoculated sheath was trimmed manually and observed by using an Olympus BX53  
552 wide field microscope at 40 hpi.

553

#### 554 **Yeast two-hybrid analysis**

555 Yeast two-hybrid assays were performed in the yeast strain Y2Hgold with Matchmaker  
556 two-hybrid system (Clontech) according to manufacturer's instruction. The baits and  
557 preys were cloned to pGADT7 and pGBKT7 respectively. The transformants were  
558 grown on the basic medium without tryptophan and leucine at 30°C for about 2 d, and  
559 subsequently the direct interaction between two proteins were tested with grown on the  
560 selective medium without tryptophan, leucine, histidine and adenine for 4-6 d.

561

#### 562 **Western blotting analysis**

563

564 For detecting Flag/GFP-tagged proteins, 0.1 g mycelia cultured in the liquid CM for 2  
565 d were collected. Total protein was extracted with lysis buffer (50 mM Tris-HCl pH  
566 7.4, 150 mM NaCl, 1 mM EDTA, 1% Triton 100 and 1 × protein inhibitor). The  
567 resulting protein was separated by 8-15% SDS polyacrylamide gel electrophoresis  
568 (SDS-PAGE) and transferred to PVDF membrane, subsequently detected by  
569 immunoblotting with anti-Flag (Sigma, A8592) or anti-GFP (Abcam, ab290) antibody.

570

571 For detecting histones, the nuclei of 0.5 g mycelia were isolated with extraction  
572 buffer (20 mM Tris pH 7.5, 20 mM KCl, 2 mM MgCl<sub>2</sub>, 25% Glycerol, 250 mM Sucrose,  
573 0.1 mM PMSF, 5 mM beta-mercaptoethanol, 1 × proteinase inhibitors) and filtered  
574 through two layers of Miracloth (Millipore). Then the histones were extracted with lysis  
575 buffer (50 mM Tris-HCl pH 7.4, 150 mM NaCl, 1 mM EDTA, 1% Triton 100 and 1 ×  
576 protein inhibitor). Total histones were separated by 15% SDS-PAGE gel and protein  
577 blots were detected with anti-H3 (Millipore, 06-755), anti-H3K27me3 (Abcam,  
578 ab6002), anti-H3K4me3 (Abcam, ab1012), anti-H3K36me3 (Abcam, ab9050), anti-

579 H3K4ac (Active motif, 39381), anti-H3K9ac (PTMBIO, PTM-112), anti-H3K18ac  
580 (PTMBIO, PTM-158), anti-H3K27ac (Abcam, ab177178) and anti-H4K5ac (Millipore,  
581 07-327) antibody. The relative intensity of Western blots was quantified by Image J  
582 software.

583

#### 584 **Co-immunoprecipitation assays**

585

586 To perform co-immunoprecipitation assays, 0.5 g mycelia cultured in the liquid CM for  
587 2 d were harvested. Total protein was extracted with lysis buffer (50 mM Tris-HCl pH  
588 7.4, 150 mM NaCl, 1 mM EDTA, 1% Triton 100 and 1 × protein inhibitor) and  
589 subsequently precipitated with anti-Flag M2 Magnetic beads (Sigma, M8823) or GFP-  
590 Trap (Chromotek, gtma-20) respectively according to the manufacture's instruction.  
591 The precipitated protein and input control were detected by the Western blotting with  
592 anti-Flag (Sigma, A8592) or anti-GFP (Abcam, ab290) antibody.

593

#### 594 **mRNA expression analysis with RT-qPCR**

595

596 Total RNA was extracted from CM cultivated mycelia for 2 d from three biological  
597 repeats using the TRIzol (Invitrogen, USA) reagent. Subsequently total RNAs were  
598 reversely transcribed into cDNAs with commercial kits (TOYOBO, FSQ-301)  
599 according to the manufacturer's instruction. RT-qPCR was performed using SYBR  
600 Green qPCR Master Mix (TOYOBO, QST-100) in the LightCycler480 system (Roche).  
601 The constitutively expressed *tubulin* gene (*MGG\_00604*) was used as endogenous  
602 control to normalize amount of cDNA templates. Primers used in the experiments were  
603 listed and described in Supplemental Table 2.

604

#### 605 **RNA-seq analysis**

606

607 Total RNA was extracted from mycelia from three biological repeats using the TRIzol  
608 (Invitrogen, USA) reagent according to the manufacturer's instruction. RNAs were  
609 sequenced separately at Novogene, using Illumina Hiseq X-Ten with Hiseq-PE150  
610 strategy. The clean reads were mapped to the reference genome of *M. oryzae* (*M. oryzae*  
611 70-15 assembly MG8 from NCBI) using TopHat software with default settings  
612 (Daehwan Kim, 2013). For analysis of differential expression, the assembled transcripts

613 from three independent biological replicates in the WT and deletion mutants were  
614 included and compared using Cuffdiff with default settings (Trapnell et al., 2010). Gene  
615 with false discovery rate (FDR) threshold of 0.05 in conjunction with at least 2-fold  
616 change in expression level was considered differentially expressed. To calculate the  
617 significance of the overlap of two gene sets, P value with Fisher's exact test for  
618 overlapping was performed online (the total number of genes in the *M. oryzae*  
619 genome used was 14317) ([http://nemates.org/MA/progs/overlap\\_stats.html](http://nemates.org/MA/progs/overlap_stats.html)). GO  
620 analysis for enriched biological processes was perform using DAVID  
621 (<https://david.ncifcrf.gov/home.jsp>) with default settings.

622

### 623 **ChIP and ChIP-seq analysis**

624

625 The ChIP experiments with mycelia were conducted as previous reports with minor  
626 modification (He et al., 2018, Tao et al., 2017). Briefly, 1 g mycelia were crosslinked  
627 with 1% formaldehyde for 20 mins and stopped with 125 mM glycine for 5 mins at  
628 room temperature. Samples were ground with liquid nitrogen and resuspended in the  
629 nuclei isolating buffer (10 mM Tris pH 8.0, 10 mM Sodium butyrate, 400 mM Sucrose,  
630 0.1 mM PMSF, 5 mM Beta-Mercaptoethanol, 1 × proteinase inhibitors). Subsequently  
631 the precipitated nuclei were used to total chromatin extraction with 1 mL lysis buffer  
632 (50 mM HEPES pH7.5, 150 mM NaCl, 1mM EDTA, 10 mM Sodium butyrate, 0.1%  
633 deoxycholate, 0.1% SDS, 1% Triton X-100, 1mM PMSF and 1 × Roche protease  
634 inhibitor Cocktail). The obtained chromatin was sonicated into DNA fragments  
635 between 200-500 bp using Diagenode Bioruptor (high setting, 16 cycles, every cycle  
636 with 30 seconds “on” and 30 seconds “off”). 20 μL chromatin solution? was used to  
637 input DNA extraction and the remainder was pre-cleared with 10 μL protein A  
638 Dynabeads (Thermofisher, 10001D) for 1 h. Then, the chromatin was incubated with  
639 anti-H3K27me3 (Abcam, ab6002) or anti- H3K4ac (Active Motif, 39381) overnight at  
640 4°C. Another 20 μL protein A Dynabeads was used to capture protein-DNA mixture  
641 and washed for three times. Protein-DNA mixture was reverse-crosslinked, and DNA  
642 was recovered with phenol-chloroform extraction. The recovered DNA was used as  
643 template for followed ChIP-qPCR and ChIP-seq. Two biological repeats were carried  
644 out.

645

646 For ChIP-seq assay, the purified DNA was used as library construction with the  
647 NEBNext Ultra II DNA Library Prep Kit for Illumina (NEB, E7645L). High-  
648 throughput sequencing was carried out using Illumina Hiseq-PE150 by Novogene  
649 Corporation (Beijing, China) for Illumina (Langmead et al., 2009). Subsequently the  
650 clean read pairs were mapped to the reference genome with Bowtie2 (Version 2.2.8)  
651 (Langmead and Salzberg, 2012) and enriched peaks were called by MACS2 (Version  
652 2.1.1) with default parameters (Zhang et al., 2008). The data was imported into the  
653 integrative genomics viewer (IGV) for visualization (James T Robinson, 2011). To  
654 assign peaks to proximal genes, the distance of 3-kb flanking the peak summit were  
655 extracted. To validate ChIP-seq results, ChIP-qPCR assay with two independent repeats  
656 was performed. The level of examined fragments was relative to internal reference gene  
657 *TUB5* using quantitative real-time PCR. The PCR primers were listed and described in  
658 Table S2.

659

#### 660 **Data availability**

661

662 The ChIP-seq and RNA-seq datasets generated in this article were deposited in the Gene  
663 Expression Omnibus (GEO) under the accession number GSE166690.

664

#### 665 **Acknowledgments**

666

667 We thank Dr. Naweed I. Naqvi of the National University of Singapore for helpful  
668 suggestions and critically reading manuscript. Thanks to Dr. Zhou Ming of Zhejiang  
669 University for help of bioinformatics analysis. Thanks to Dr. Qi Zhenyu of agricultural  
670 experimental station of Zhejiang University for controlling the light environment of  
671 artificial climate chamber.

672

#### 673 **Funding**

674

675 This research was supported in part by the National Natural Science Foundation of  
676 China (31970534 to Z.T., 32000103 to Y.K.), the Fundamental Research Funds for the

677 Central Universities (2019QNA6014 to Z.T.), key R&D project of China National Rice  
678 Research Institute, grand number “CNRRI-2020-04”, and Open Project Program  
679 (20190301 to Z.T.) of State Key Laboratory of Rice Biology. This project was supported  
680 by the Chinese Academy of Agricultural Sciences under the “Elite Youth” program, the  
681 Agricultural Sciences and Technologies Innovation Program and Hundred-Talent  
682 Program of Zhejiang University.

683 The funders had no role in the design of the study; in the collection, analyses, or  
684 interpretation of data; in the writing of the manuscript, or in the decision to publish the  
685 results.

686

### 687 **Author contributions**

688

689 Y.K. and Z.T. conceived and designed the experiments; Y.K., J.Q. and Z.W. performed  
690 the experiments; H.S., C.L., J.Y., Z.L. and W.X. provided technical assistance and  
691 contributed reagents/materials/analysis tools; Y.K. and Z.T. wrote the paper.

692

693 **Competing interests:** The authors declare no conflict of interest.

694

695

### 696 **References**

697 ADAMS, G. E., CHANDRU, A. & COWLEY, S. M. 2018. Co-repressor, co-activator and general transcription  
698 factor: the many faces of the Sin3 histone deacetylase (HDAC) complex. *Biochem J*, 475, 3921-  
699 3932.

700 BLACKLEDGE, N. P., ROSE, N. R. & KLOSE, R. J. 2015. Targeting Polycomb systems to regulate gene  
701 expression: modifications to a complex story. *Nat Rev Mol Cell Biol*, 16, 643-649.

702 CAVALLI, G. & HEARD, E. 2019. Advances in epigenetics link genetics to the environment and disease.  
703 *Nature*, 571, 489-499.

704 CHADHA, S. & SHARMA, M. 2014. Transposable elements as stress adaptive capacitors induce genomic  
705 instability in fungal pathogen *Magnaporthe oryzae*. *PLoS One*, 9, e94415.

706 CHUJO, T. & SCOTT, B. 2014. Histone H3K9 and H3K27 methylation regulates fungal alkaloid biosynthesis  
707 in a fungal endophyte-plant symbiosis. *Mol Microbiol*, 92, 413-34.

708 CONNOLLY, L. R., SMITH, K. M. & FREITAG, M. 2013. The Fusarium H3K27me3 KMT6 regulates  
709 development and expression of secondary metabolite gene clusters. *PLoS Genet*, 9, e1003916.

710 DAEHWAN KIM, G. P., COLE TRAPNELL, HAROLD PIMENTEL, RYAN KELLEY AND STEVEN L SALZBERG 2013.

- 711 TopHat2: accurate alignment of transcriptomes in the presence of insertions, deletions and  
712 gene fusions. *Genome Biol*, 14, R36.
- 713 DING, S. L., LIU, W., ILIUK, A., RIBOT, C., VALLET, J., TAO, A., WANG, Y., LEBRUN, M. H. & XU, J. R. 2010.  
714 The Tlg1 histone deacetylase complex regulates infectious growth in the rice blast fungus  
715 *Magnaporthe oryzae*. *Plant Cell*, 22, 2495-508.
- 716 DONG, Y., LI, Y., QI, Z., ZHENG, X. & ZHANG, Z. 2016. Genome plasticity in filamentous plant pathogens  
717 contributes to the emergence of novel effectors and their cellular processes in the host. *Curr*  
718 *Genet*, 62, 47-51.
- 719 DONG, Y., LI, Y., ZHAO, M., JING, M., LIU, X., LIU, M., GUO, X., ZHANG, X., CHEN, Y., LIU, Y., LIU, Y., YE, W.,  
720 ZHANG, H., WANG, Y., ZHENG, X., WANG, P. & ZHANG, Z. 2015. Global genome and  
721 transcriptome analyses of *Magnaporthe oryzae* epidemic isolate 98-06 uncover novel effectors  
722 and pathogenicity-related genes, revealing gene gain and lose dynamics in genome evolution.  
723 *PLoS Pathog*, 11, e1004801.
- 724 DUMESIC, P. A., HOMER, C. M., MORESCO, J. J., PACK, L. R., SHANLE, E. K., COYLE, S. M., STRAHL, B. D.,  
725 FUJIMORI, D. G., YATES, J. R., 3RD & MADHANI, H. D. 2015. Product binding enforces the  
726 genomic specificity of a yeast polycomb repressive complex. *Cell*, 160, 204-18.
- 727 FOUCHE, S., PLISSONNEAU, C. & CROLL, D. 2018. The birth and death of effectors in rapidly evolving  
728 filamentous pathogen genomes. *Curr Opin Microbiol*, 46, 34-42.
- 729 GRZENDA, A., LOMBERK, G., ZHANG, J. S. & URRUTIA, R. 2009. Sin3: master scaffold and transcriptional  
730 corepressor. *Biochim Biophys Acta*, 1789, 443-50.
- 731 GU, X., JIANG, D., YANG, W., JACOB, Y., MICHAELS, S. D. & HE, Y. 2011. *Arabidopsis* homologs of  
732 retinoblastoma-associated protein 46/48 associate with a histone deacetylase to act  
733 redundantly in chromatin silencing. *PLoS Genet*, 7, e1002366.
- 734 HE, M., XU, Y., CHEN, J., LUO, Y., LV, Y., SU, J., KERSHAW, M. J., LI, W., WANG, J., YIN, J., ZHU, X., LIU, X.,  
735 CHERN, M., MA, B., WANG, J., QIN, P., CHEN, W., WANG, Y., WANG, W., REN, Z., WU, X., LI, P.,  
736 LI, S., PENG, Y., LIN, F., TALBOT, N. J. & CHEN, X. 2018. MoSnt2-dependent deacetylation of  
737 histone H3 mediates MoTor-dependent autophagy and plant infection by the rice blast fungus  
738 *Magnaporthe oryzae*. *Autophagy*, 14, 1543-1561.
- 739 HUANG, F., YUAN, W., TIAN, S., ZHENG, Q. & HE, Y. 2019. *SIN3 LIKE* genes mediate long-day induction of  
740 flowering but inhibit the floral transition in short days through histone deacetylation in  
741 *Arabidopsis*. *Plant J*, 100, 101-113.
- 742 JAMES T ROBINSON, H. T., WENDY WINCKLER, MITCHELL GUTTMAN, ERIC S LANDER, GAD GETZ & JILL  
743 P MESIROV 2011. Integrative genomics viewer. *Nature*, 29, 24-26.
- 744 JAMIESON, K., ROUNTREE, M. R., LEWIS, Z. A., STAJICH, J. E. & SELKER, E. U. 2013. Regional control of  
745 histone H3 lysine 27 methylation in *Neurospora*. *Proc Natl Acad Sci U S A*, 110, 6027-32.
- 746 JEON, J., LEE, G. W., KIM, K. T., PARK, S. Y., KIM, S., KWON, S., HUH, A., CHUNG, H., LEE, D. Y., KIM, C. Y. &  
747 LEE, Y. H. 2020. Transcriptome profiling of the rice blast fungus *Magnaporthe oryzae* and its  
748 host *Oryza sativa* during infection. *Mol Plant Microbe Interact*, 33, 141-144.
- 749 JULIA I. QÜESTA, J. S., NUNO GERALDO, HAILONG AN, CAROLINE DEAN 2016. *Arabidopsis* transcriptional  
750 repressor VAL1 triggers Polycomb silencing at *FLC* during vernalization. 353, 485-488.
- 751 KASSIS, J. A. & BROWN, J. L. 2013. Polycomb group response elements in *Drosophila* and vertebrates.  
752 *Adv Genet*, 81, 83-118.
- 753 KHANG, C. H., BERRUYER, R., GIRALDO, M. C., KANKANALA, P., PARK, S. Y., CZYMMEK, K., KANG, S. &  
754 VALENT, B. 2010. Translocation of *Magnaporthe oryzae* effectors into rice cells and their



- 755 subsequent cell-to-cell movement. *Plant Cell*, 22, 1388-403.
- 756 KOU, Y., TAN, Y. H., RAMANUJAM, R. & NAQVI, N. I. 2017. Structure-function analyses of the Pth11  
757 receptor reveal an important role for CFEM motif and redox regulation in rice blast. *New Phytol*,  
758 214, 330-342.
- 759 LANGMEAD, B. & SALZBERG, S. L. 2012. Fast gapped-read alignment with Bowtie 2. *Nat Methods*, 9,  
760 357-9.
- 761 LANGMEAD, B., TRAPNELL, C., POP, M. & SALZBERG, S. L. 2009. Ultrafast and memory-efficient  
762 alignment of short DNA sequences to the human genome. *Genome Biol*, 10, R25.
- 763 LANZUOLO, C. & ORLANDO, V. 2012. Memories from the polycomb group proteins. *Annu Rev Genet*, 46,  
764 561-89.
- 765 LEE, J., LEE, J. J. & JEON, J. 2019. A histone deacetylase, MoHOS2 regulates asexual development and  
766 virulence in the rice blast fungus. *J Microbiol*, 57, 1115-1125.
- 767 LUO, X. & HE, Y. 2020. Experiencing winter for spring flowering: A molecular epigenetic perspective on  
768 vernalization. *J Integr Plant Biol*, 62, 104-117.
- 769 MARGUERON, R. & REINBERG, D. 2011. The Polycomb complex PRC2 and its mark in life. *Nature*, 469,  
770 343-9.
- 771 MEHDI, S., DERKACHEVA, M., RAMSTROM, M., KRALEMANN, L., BERGQUIST, J. & HENNIG, L. 2016. The  
772 WD40 domain protein MSI1 functions in a histone deacetylase complex to fine-tune abscisic  
773 acid signaling. *Plant Cell*, 28, 42-54.
- 774 MOSQUERA, G., GIRALDO, M. C., KHANG, C. H., COUGHLAN, S. & VALENT, B. 2009. Interaction  
775 transcriptome analysis identifies *Magnaporthe oryzae* BAS1-4 as Biotrophy-associated  
776 secreted proteins in rice blast disease. *Plant Cell*, 21, 1273-90.
- 777 NETEA, M. G., JOOSTEN, L. A., LATZ, E., MILLS, K. H., NATOLI, G., STUNNENBERG, H. G., O'NEILL, L. A. &  
778 XAVIER, R. J. 2016. Trained immunity: A program of innate immune memory in health and  
779 disease. *Science*, 352, aaf1098.
- 780 PHAM, K. T., INOUE, Y., VU, B. V., NGUYEN, H. H., NAKAYASHIKI, T., IKEDA, K. & NAKAYASHIKI, H. 2015.  
781 MoSET1 (histone H3K4 methyltransferase in *Magnaporthe oryzae*) regulates global gene  
782 expression during infection-related morphogenesis. *PLoS Genet*, 11, e1005385.
- 783 RIDENOUR, J. B., MOLLER, M. & FREITAG, M. 2020. Polycomb repression without bristles: facultative  
784 heterochromatin and genome stability in fungi. *Genes (Basel)*, 11, 638.
- 785 SANCHEZ-VALLET, A., FOUCHE, S., FUDAL, I., HARTMANN, F. E., SOYER, J. L., TELLIER, A. & CROLL, D. 2018.  
786 The genome biology of effector gene evolution in filamentous plant pathogens. *Annu Rev*  
787 *Phytopathol*, 56, 21-40.
- 788 SCHUETTENGROBER, B., BOURBON, H. M., DI CROCE, L. & CAVALLI, G. 2017. Genome regulation by  
789 Polycomb and Trithorax: 70 years and counting. *Cell*, 171, 34-57.
- 790 SHARPEE, W., OH, Y., YI, M., FRANCK, W., EYRE, A., OKAGAKI, L. H., VALENT, B. & DEAN, R. A. 2017.  
791 Identification and characterization of suppressors of plant cell death (SPD) effectors from  
792 *Magnaporthe oryzae*. *Mol Plant Pathol*, 18, 850-863.
- 793 TAO, Z., SHEN, L., GU, X., WANG, Y., YU, H. & HE, Y. 2017. Embryonic epigenetic reprogramming by a  
794 pioneer transcription factor in plants. *Nature*, 551, 124-128.
- 795 TRAPNELL, C., WILLIAMS, B. A., PERTEA, G., MORTAZAVI, A., KWAN, G., VAN BAREN, M. J., SALZBERG, S.  
796 L., WOLD, B. J. & PACTER, L. 2010. Transcript assembly and quantification by RNA-Seq reveals  
797 unannotated transcripts and isoform switching during cell differentiation. *Nat Biotechnol*, 28,  
798 511-5.

799 WANG, L., CHEN, H., LI, J., SHU, H., ZHANG, X., WANG, Y., TYLER, B. M. & DONG, S. 2020. Effector gene  
800 silencing mediated by histone methylation underpins host adaptation in an *oomycete* plant  
801 pathogen. *Nucleic Acids Res*, 48, 1790-1799.

802 WILES, E. T. & SELKER, E. U. 2017. H3K27 methylation: a promiscuous repressive chromatin mark. *Curr*  
803 *Opin Genet Dev*, 43, 31-37.

804 XIAO, J., JIN, R., YU, X., SHEN, M., WAGNER, J. D., PAI, A., SONG, C., ZHUANG, M., KLASFELD, S., HE, C.,  
805 SANTOS, A. M., HELLIWELL, C., PRUNEDA-PAZ, J. L., KAY, S. A., LIN, X., CUI, S., GARCIA, M. F.,  
806 CLARENZ, O., GOODRICH, J., ZHANG, X., AUSTIN, R. S., BONASIO, R. & WAGNER, D. 2017. *Cis*  
807 and *trans* determinants of epigenetic silencing by Polycomb repressive complex 2 in  
808 *Arabidopsis*. *Nat Genet*, 49, 1546-1552.

809 ZHANG, S., LIANG, M., NAQVI, N. I., LIN, C., QIAN, W., ZHANG, L. H. & DENG, Y. Z. 2017. Phototrophy and  
810 starvation-based induction of autophagy upon removal of Gcn5-catalyzed acetylation of Atg7  
811 in *Magnaporthe oryzae*. *Autophagy*, 13, 1318-1330.

812 ZHANG, W., HUANG, J. & COOK, D. E. 2021. Histone modification dynamics at H3K27 are associated with  
813 altered transcription of *in planta* induced genes in *Magnaporthe oryzae*. *PLoS Genet*, 17,  
814 e1009376.

815 ZHANG, Y., LIU, T., MEYER, C. A., EECKHOUTE, J., JOHNSON, D. S., BERNSTEIN, B. E., NUSBAUM, C., MYERS,  
816 R. M., BROWN, M., LI, W. & LIU, X. S. 2008. Model-based analysis of ChIP-Seq (MACS). *Genome*  
817 *Biol*, 9, R137.

818

819

820

821

822

823

824

825

826

827

828

829

830

831

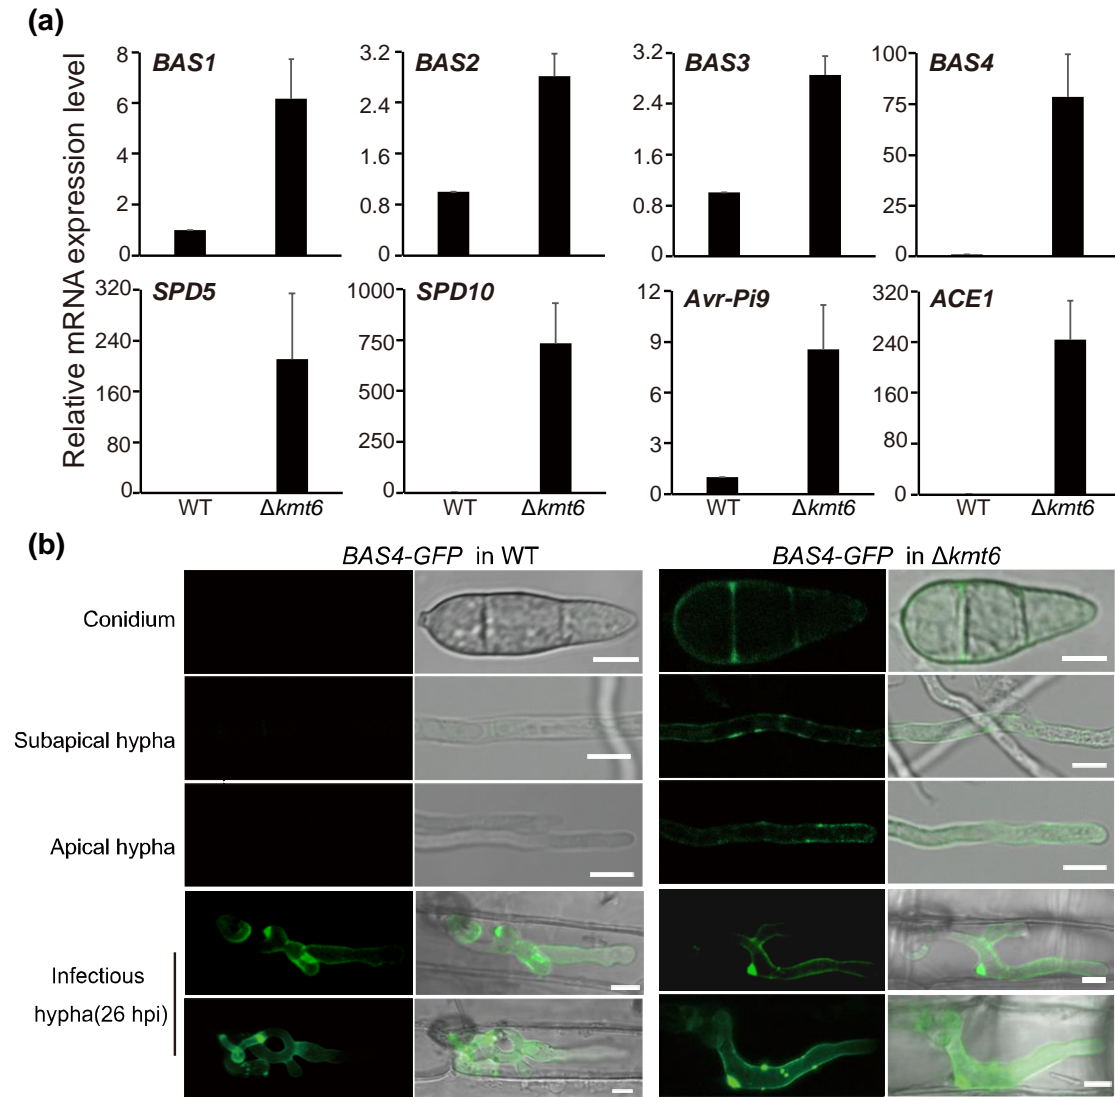

**Figure 1. Loss of *KMT6* results in activation of effectors in the vegetative growth stage in *M. oryzae*.** (a) Relative expression level of representative effectors in the WT and  $\Delta kmt6$  strains by qRT-PCR. The  $\beta$ -tubulin gene was used as the endogenous reference gene. Bar means standard error of three biological repeats. (b) Confocal microscopy image of Bas4-GFP in the vegetative and *in planta* growth stages of the WT and  $\Delta kmt6$  strains. In the WT, Bas4-GFP fluorescence is only presented in the *in planta* growth stage, while in the  $\Delta kmt6$ , Bas4-GFP fluorescence could be detected in the conidia, apical hypha, subapical hypha and invasive hypha. Bar = 5  $\mu$ m.

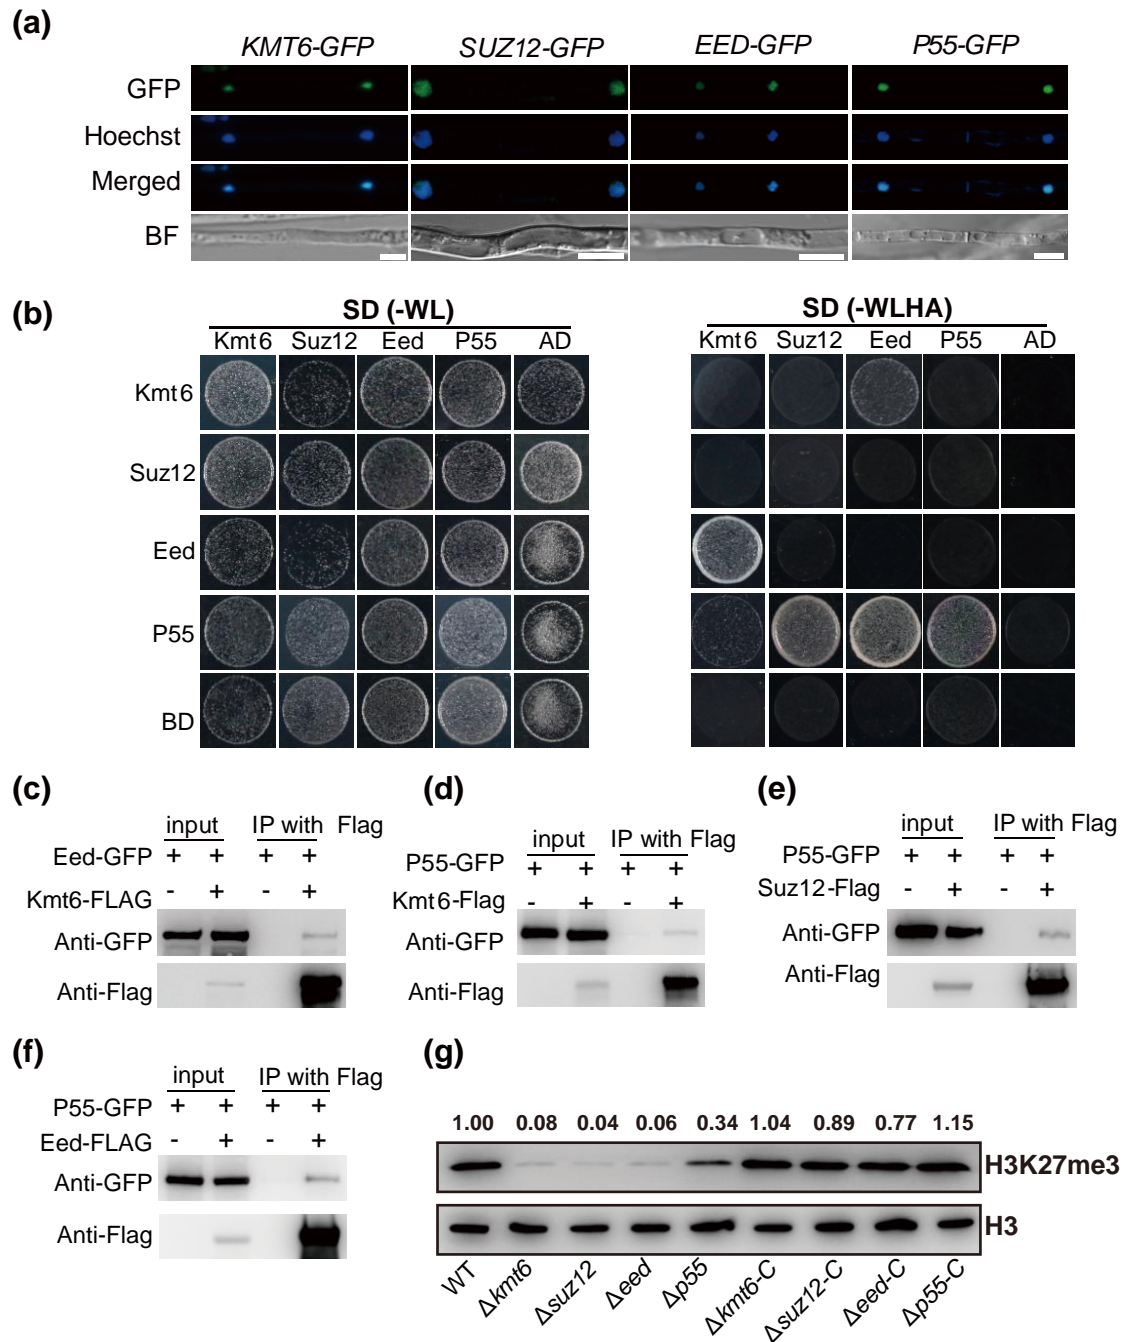

**Figure 2. Core subunits Kmt6, Eed, Suz12, together with P55, are involved in the Poly-comb repressive complex 2 in *M. oryzae*.**

(a) Confocal microscopy-based subcellular localization of PRC2 subunits fused with GFP. The GFP signal co-localized with Hoechst (10  $\mu$ g/mL) stained nuclei. Bar = 5  $\mu$ m. (b) Yeast-two-hybrid assay of PRC2 components Kmt6, Eed, Suz12 and P55. The bait and prey plasmids were co-transformed into yeast strain Y2Hgold respectively, then the transformants were grown on basal medium SD (-WL, without tryptophan and leucine) and selective medium SD (-WLHA, without tryptophan, leucine, histidine and adenine). (c-f) Co-immunoprecipitation (CoIP) was performed with the strains expressing both *Kmt6-Flag* and *Suz12-GFP*, *P55-GFP* and *Kmt6-Flag*, *P55-GFP* and *Suz12-Flag*, or *P55-GFP* and *Eed-Flag*. (g) Western blot detection of histone H3 and histone

methylation H3K27me3 in the WT,  $\Delta kmt6$ ,  $\Delta eed$ ,  $\Delta suz12$  and  $\Delta P55$  strains. The intensity abundance was measured and calculated relative to that of the WT. Two repeated biological experiments were carried out and the results were similar.

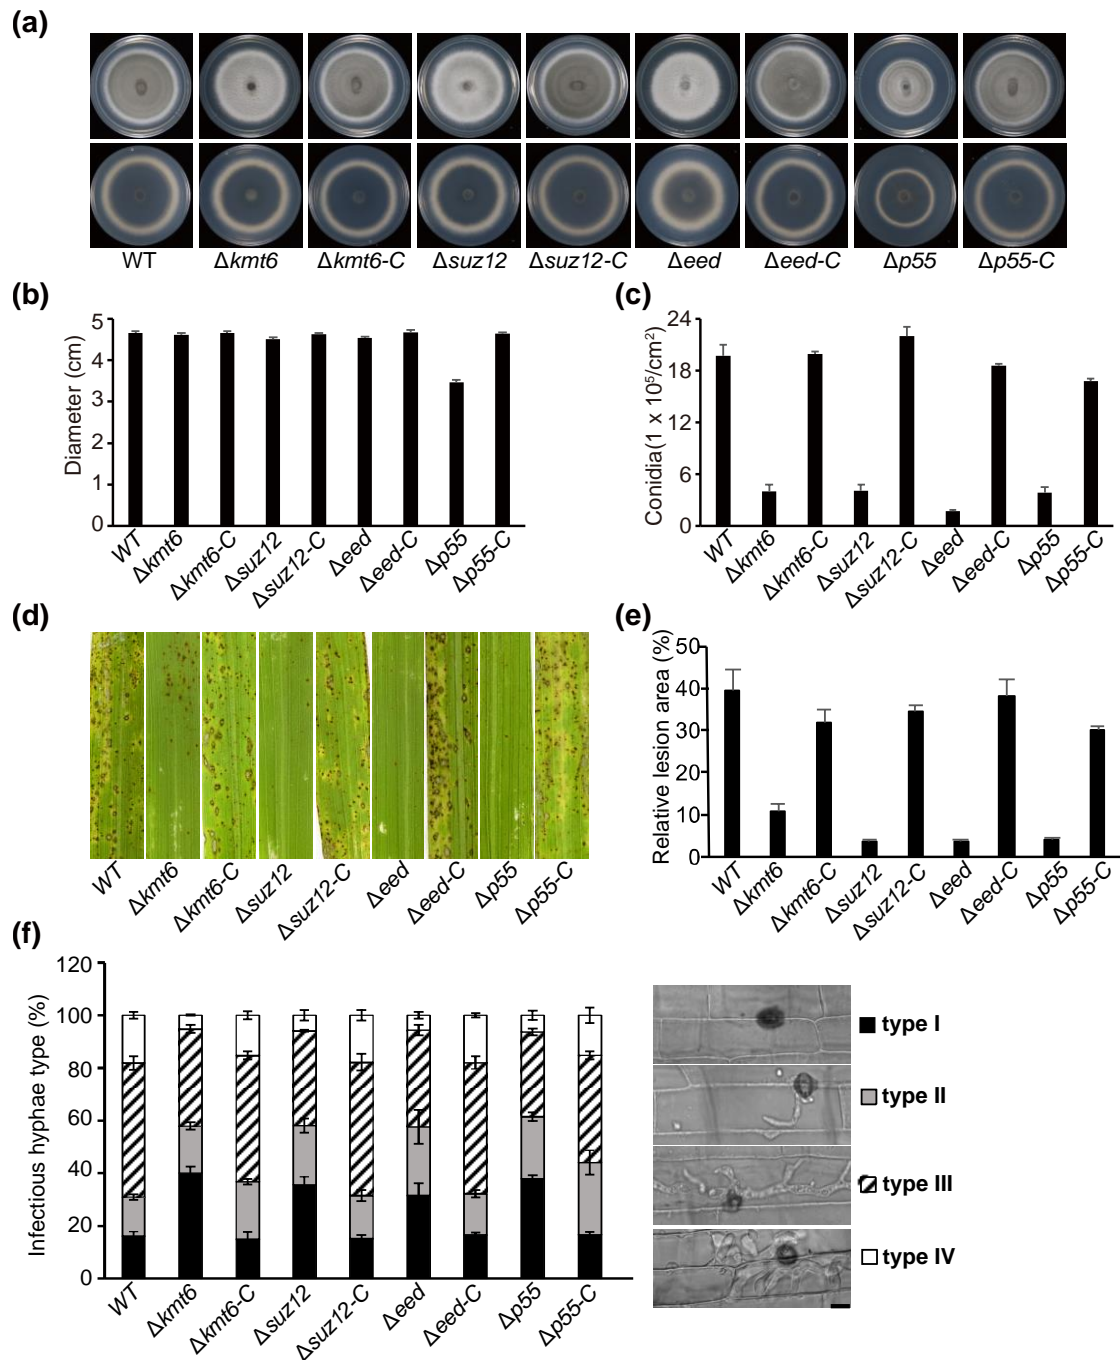

**Figure 3. PRC2 complex is required for fungal growth and pathogenicity in *M. oryzae*.**

(a) Radical growth of the WT,  $\Delta kmt6$ ,  $\Delta eed$ ,  $\Delta suz12$ ,  $\Delta P55$  and their complementation strains. Colonies of indicated strains were grown on the PA medium for 7 d, then both up and bottom sides of colonies were imaged. (b) Statistical analysis of colonies diameters of tested strains on the PA medium. (c) Bar charts showing the conidia that produced in the indicated strain of *M. oryzae*. (d) Observation and statistical analysis of invasive hypha growth in rice sheath cells at 40 hpi. Four types of invasive hypha (illustrated in the right panel with corresponding column): no penetration, penetration with primary hyphae, with differentiated secondary invasive hyphae, and invasive hyphae spreading into neighbouring cells, were quantified. Data represents mean  $\pm$  SD

of three independent repeats, with  $n = 300$  appressoria per analysis. Scale bar =  $5 \mu\text{m}$ .  
(e) Blast infection assays using rice seedlings (*Oryza sativa* L., cultivar CO39). Deletion of *KMT6*, *EED*, *SUZ12* and *P55* impaired the pathogenicity of *M. oryzae*.  
(f) Relative lesions area of indicated strains. The relative area of lesions was quantified by Image J software. Data represents the mean  $\pm$  SD from three independent replicates.

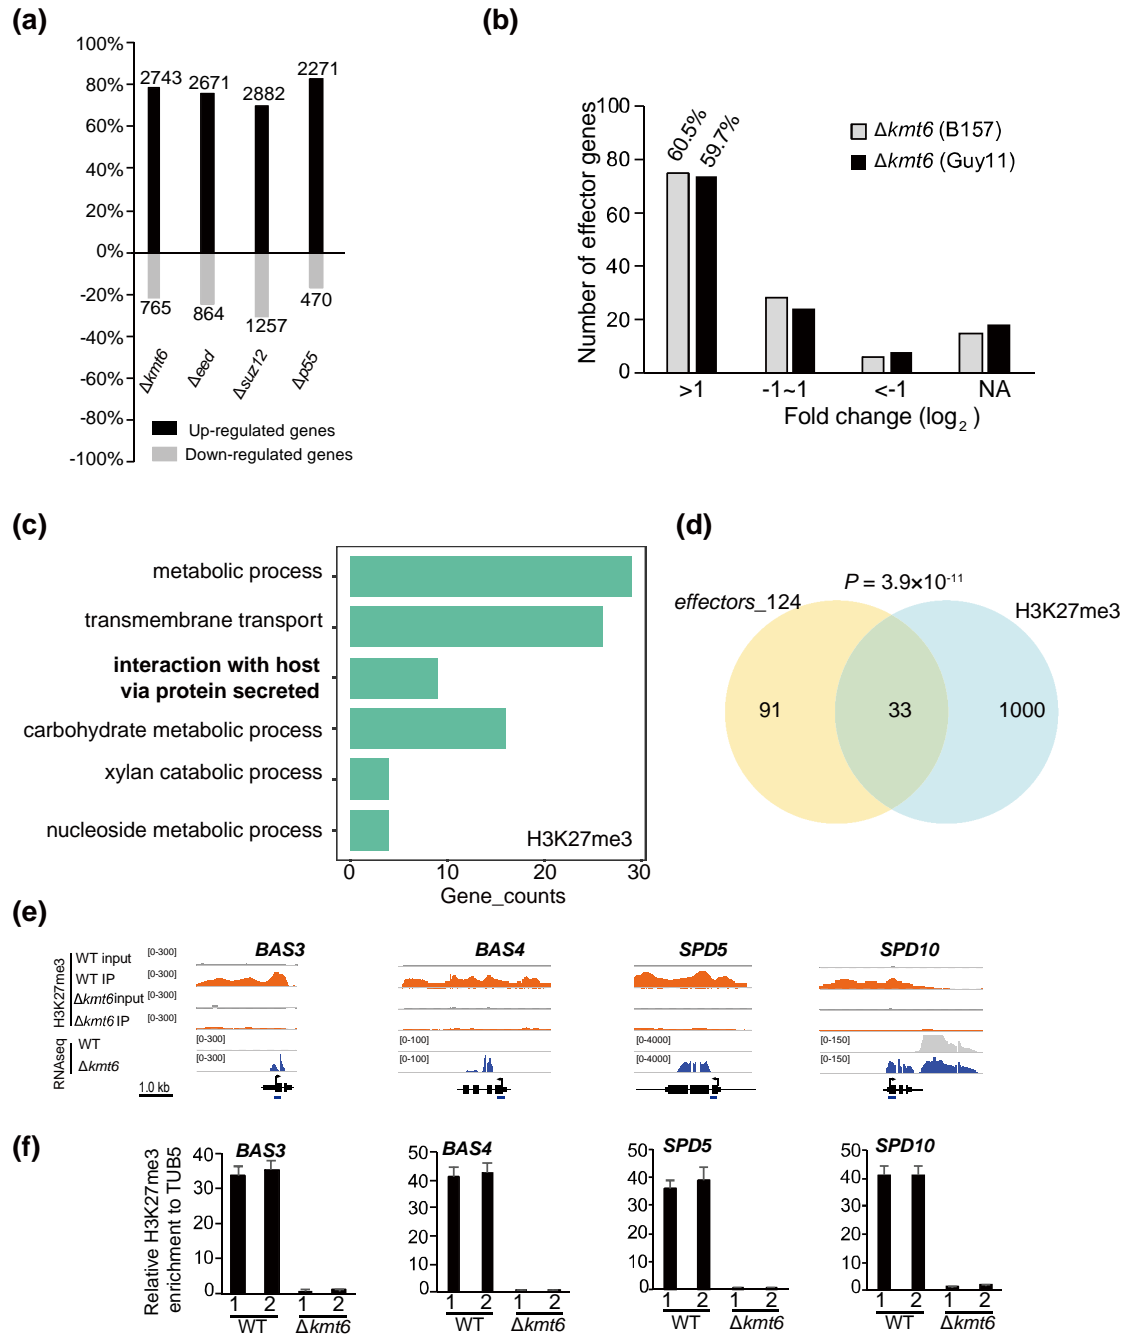

**Figure 4. PRC2-mediated H3K27me3 activity is necessary for the suppression of effectors during vegetative growth stage in *M. oryzae*.**

(a) Summary of up- and down-regulated genes in the different *PRC2* component mutants with RNA-seq analysis. The number at the top or bottom is the number of DEGs in the mutant. The Y-axis is the percentage of up- and down-regulated genes in all DEGs. Data was obtained from three independent biological repeats. (b) The distribution of 124 *effectors* based on the expression change in  $\Delta kmt6$ -UEG (B157) and  $\Delta kmt6$ -UEG (Guy11) compared with that of their WT respectively with our RNA-seq analysis. (c) GO analysis of H3K27me3 marked genes. (d) The Venn diagram showing statistically significant overlap between gene sets of H3K27me3 marked genes and putative 124 *effectors*. (e) Genome browser views of H3K27me3 occupancy from



ChIP-seq and expression pattern from RNA-seq of selected genes. ChIP-seq was conducted with two biological repeats. The number areas were reads per million (RPM). (f) ChIP-qPCR verified the enrichment of H3K27me3 at the chromatin of selected *effectors*. The examined regions were shown at the bottom. The relative enrichments were calculated by relative quantitation from two biological repeats, which was standardized with internal control *TUB5*, and then compared with that of WT. Bar represents standard error from three technical repeats.

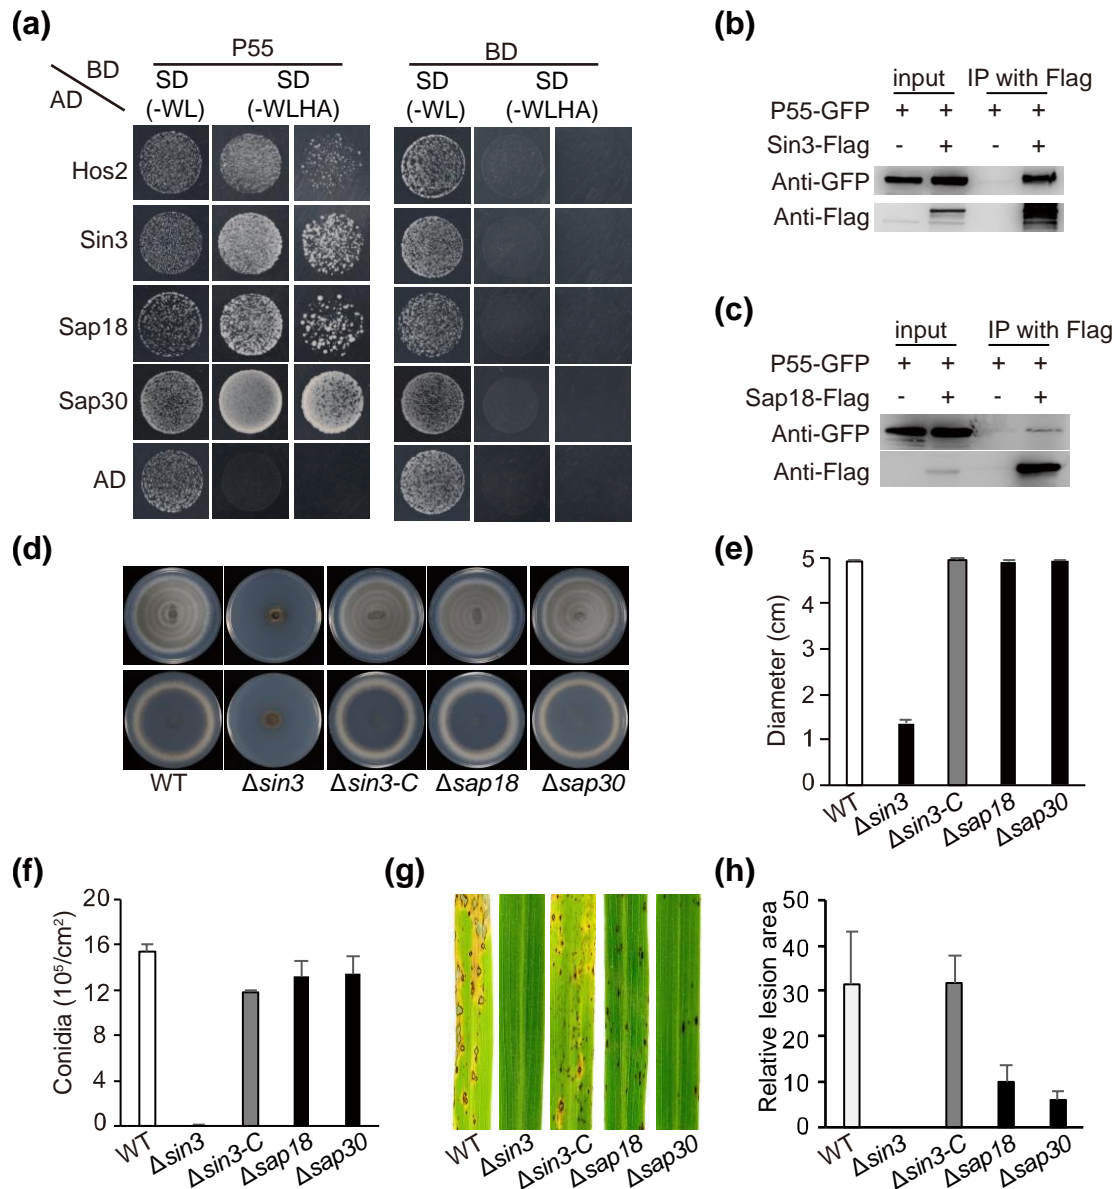

**Figure 5. P55 associates with Sin3-HDAC complex which is required for pathogenicity in *M. oryzae*.**

(a) Yeast-two-hybrid assay of P55 and Sin3-HDAC component HDAC, Sin3, Sap18, and Sap30. The bait and prey plasmids were co-transformed into yeast strain Y2Hgold respectively, then the transformants were grown on basal medium SD (-WL) and selective medium SD (-WLHA). (b-c) Co-immunoprecipitation assays were performed with the strains expressing Sin3-Flag and P55-GFP, Sap18-Flag and P55-GFP. (d-e) Radical growth of the *SIN3-HDAC* deletion strains on the PA medium cultured for 7 d. (f) Deletion of *Sin3* resulted in decreased conidiation. (g-h) *Sin3-HDAC* is required for pathogenicity of *M. oryzae*. Rice seedling infection assay of the WT and *Sin3-HDAC* deletion strains with cultivar Co39. Similar results were obtained from two biological repeats.

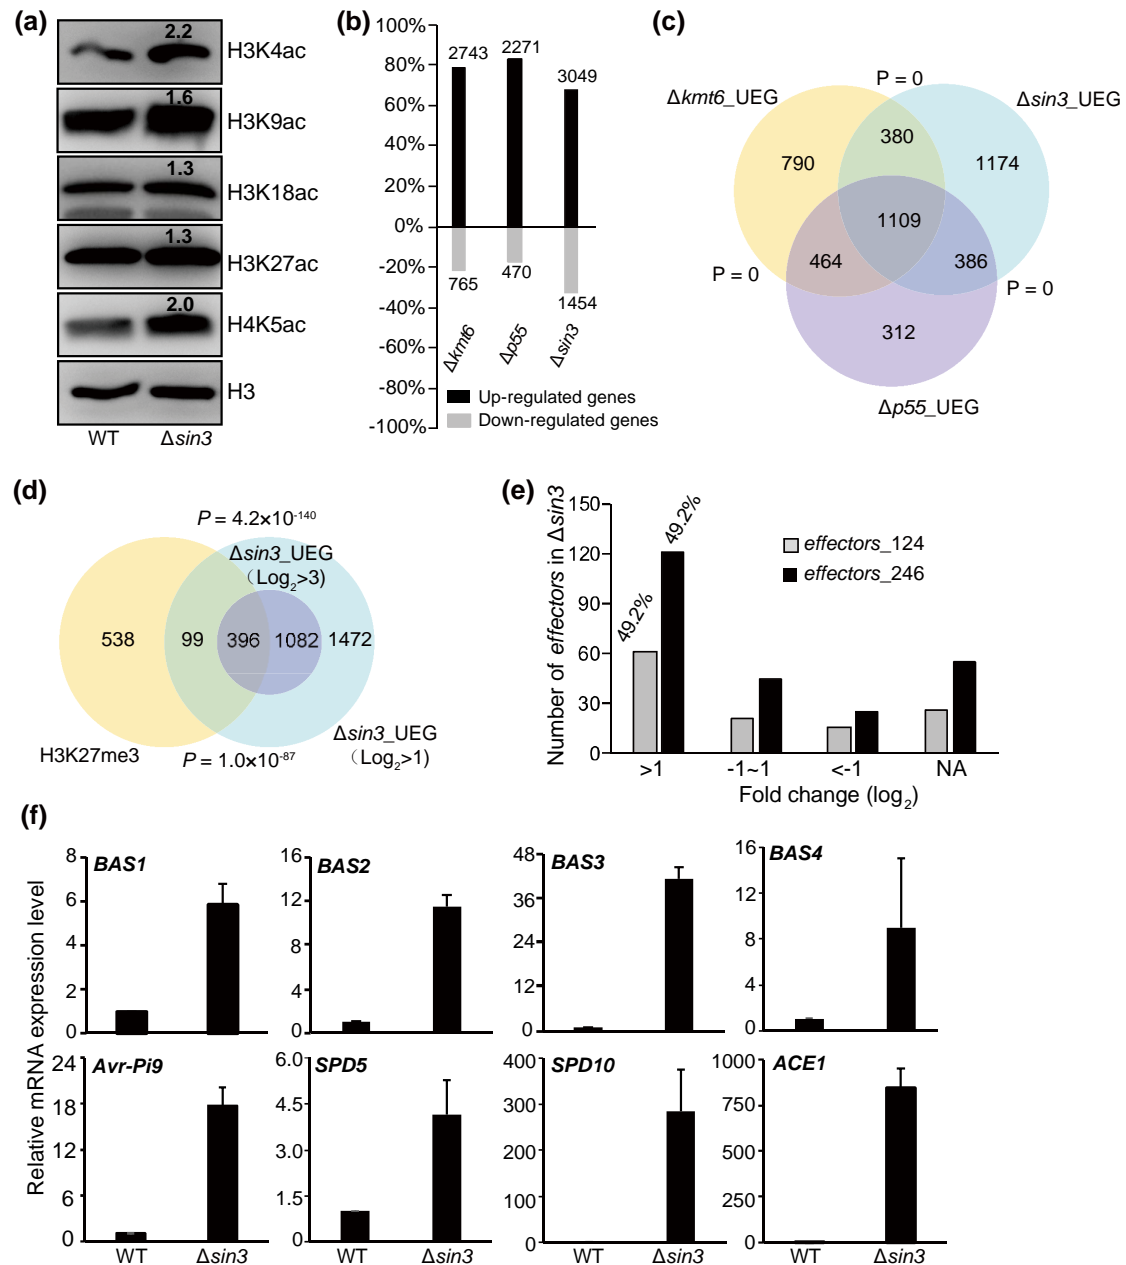

**Figure 6. Sin3-HDAC coordinates with PRC2 to prompt H3K27me3-mediated transcriptional silencing on effectors.**

(a) Levels of histone acetylation at the examined residues were measured by Western blotting assay in the WT and  $\Delta sin3$  strains. The number at the top of band is the relative intensity calculated by Image J software. Similar results were obtained from three biological repeats. (b) Summary of up- and down-regulated genes in the  $\Delta p55$  and  $\Delta sin3$  by comparing with that of WT. The number at the top or bottom is the number of DEG in the mutant. The Y-axis is the percentage of up- and down-regulated genes in all DEG. Data was obtained from three biological repeats. (c) The Venn diagram showing statistically significant overlaps among genes sets of  $\Delta sin3$ -UEG,  $\Delta p55$ -UEG and  $\Delta kmt6$ -UEG. P value with Fisher's exact test for overlapping between gene sets were labeled. (d) The Venn diagram showing statistically significant overlap between genes

sets of H3K27me<sub>3</sub>-marked genes and  $\Delta sin3$ -UEG. (e) The distribution of putative 124 and 246 *effectors* based on the expression change in  $\Delta sin3$ -UEG. (f) Relative expression level of representative *effectors* were checked in WT and  $\Delta sin3$  by qRT-PCR. Data represents mean $\pm$ SD of three independent biological replicates.

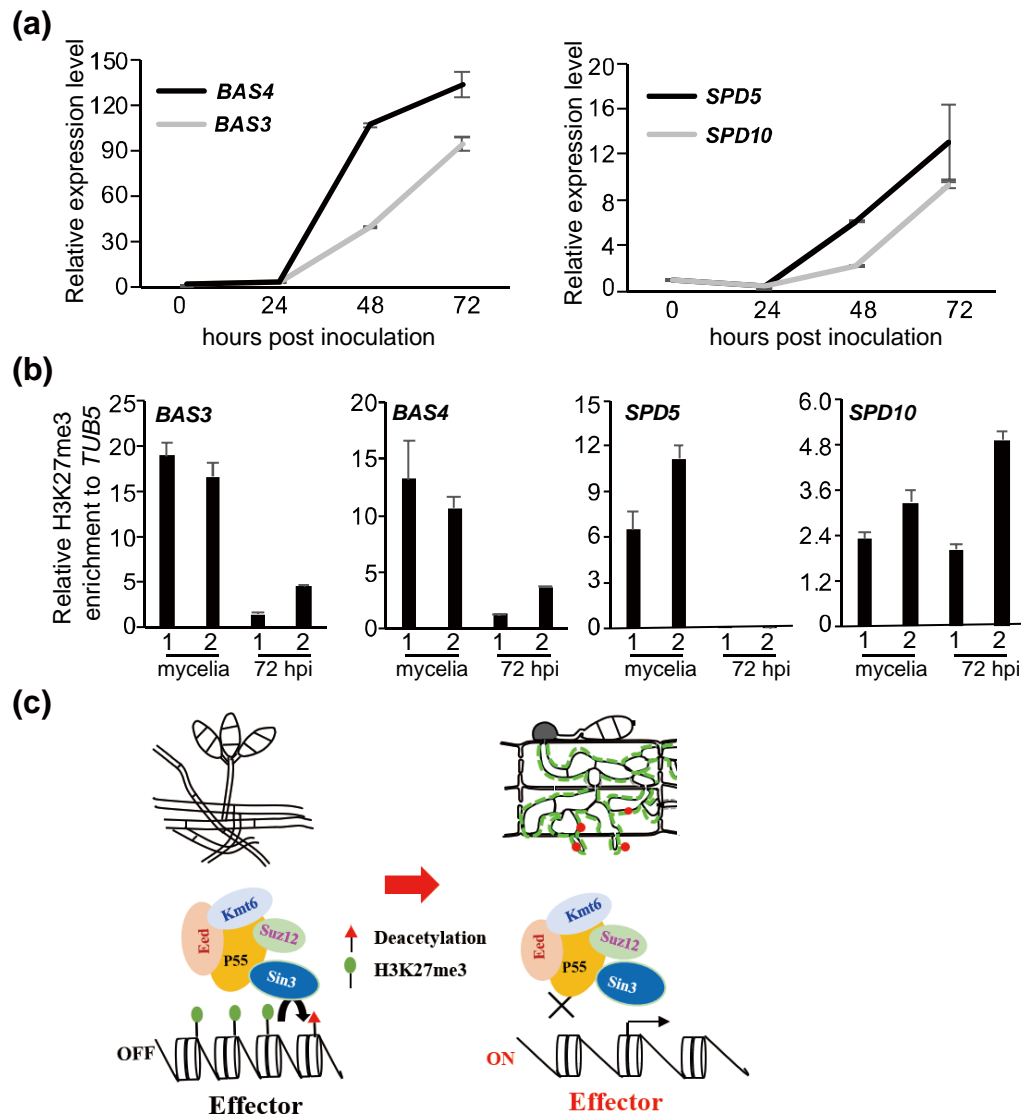

**Figure 7. H3K27me3 modification is “erased” from the chromatin of *effectors* at the early stage of infection.**

(a) The expression of the *effectors* *BAS3*, *BAS4*, *SPD5*, and *SPD10* were induced by host.

(b) H3K27me3 modification at the chromatin of *effectors* was removed at the early stage of infection.

(c) Model of *effectors* reprogramming during transition from vegetative growth to *in planta* growth. During vegetative growth stage, PRC2 coordinates with Sin3 histone deacetylase complex suppresses the expression of *effectors* in *M. oryzae*, while during the invasion growth stage, H3K27me3 modification is “erased” upon the perception of signals from host, then the *effectors* are expressed.

## Supporting Information

### **Article title: Suppression of histone modification epigenetically reprograms the genome-wide expression of *effectors* during *Magnaporthe oryzae*–rice interaction**

The following Supporting Information is available for this article:

**Figure S1.** Phylogenetic analysis of PRC2 components in *M. oryzae*.

**Figure S2.** Detection of H3K4me3 and H3K36me3 level in the deletion strains by Western blot analysis.

**Figure S3.** Bioinformatics analysis of PRC2 subunits based on RNA-seq.

**Figure S4.** Expression pattern of *effectors* in the *PRC2* mutants.

**Figure S5.** Expression pattern of *effectors* in the  $\Delta kmt6$ (Guy11) mutant.

**Figure S6.** Absence of H3K27me3 partially mimics host-derived signal.

**Figure S7.** H3K27me3 modification deposits on the chromatin of *effectors* and infection-specific genes during vegetative growth stage.

**Figure S8.** Sin3 histone deacetylase complex contributes to histone deacetylation.

**Figure S9.** GO analysis on gene sets of  $\Delta sin3$ -UEG.

**Figure S10.** Confocal microscopy-based subcellular localization of Bas4-GFP in the vegetative and *in planta* growth stages in the WT and  $\Delta sin3$  strains.

**Table S1.** Components of polycomb repressive complex in *M. oryzae*, *N. crassa*, *A. thaliana*, and *D. melanogaster*.

**Table S2.** Primers used in this study.

**Table S3.** Strains used in this study.

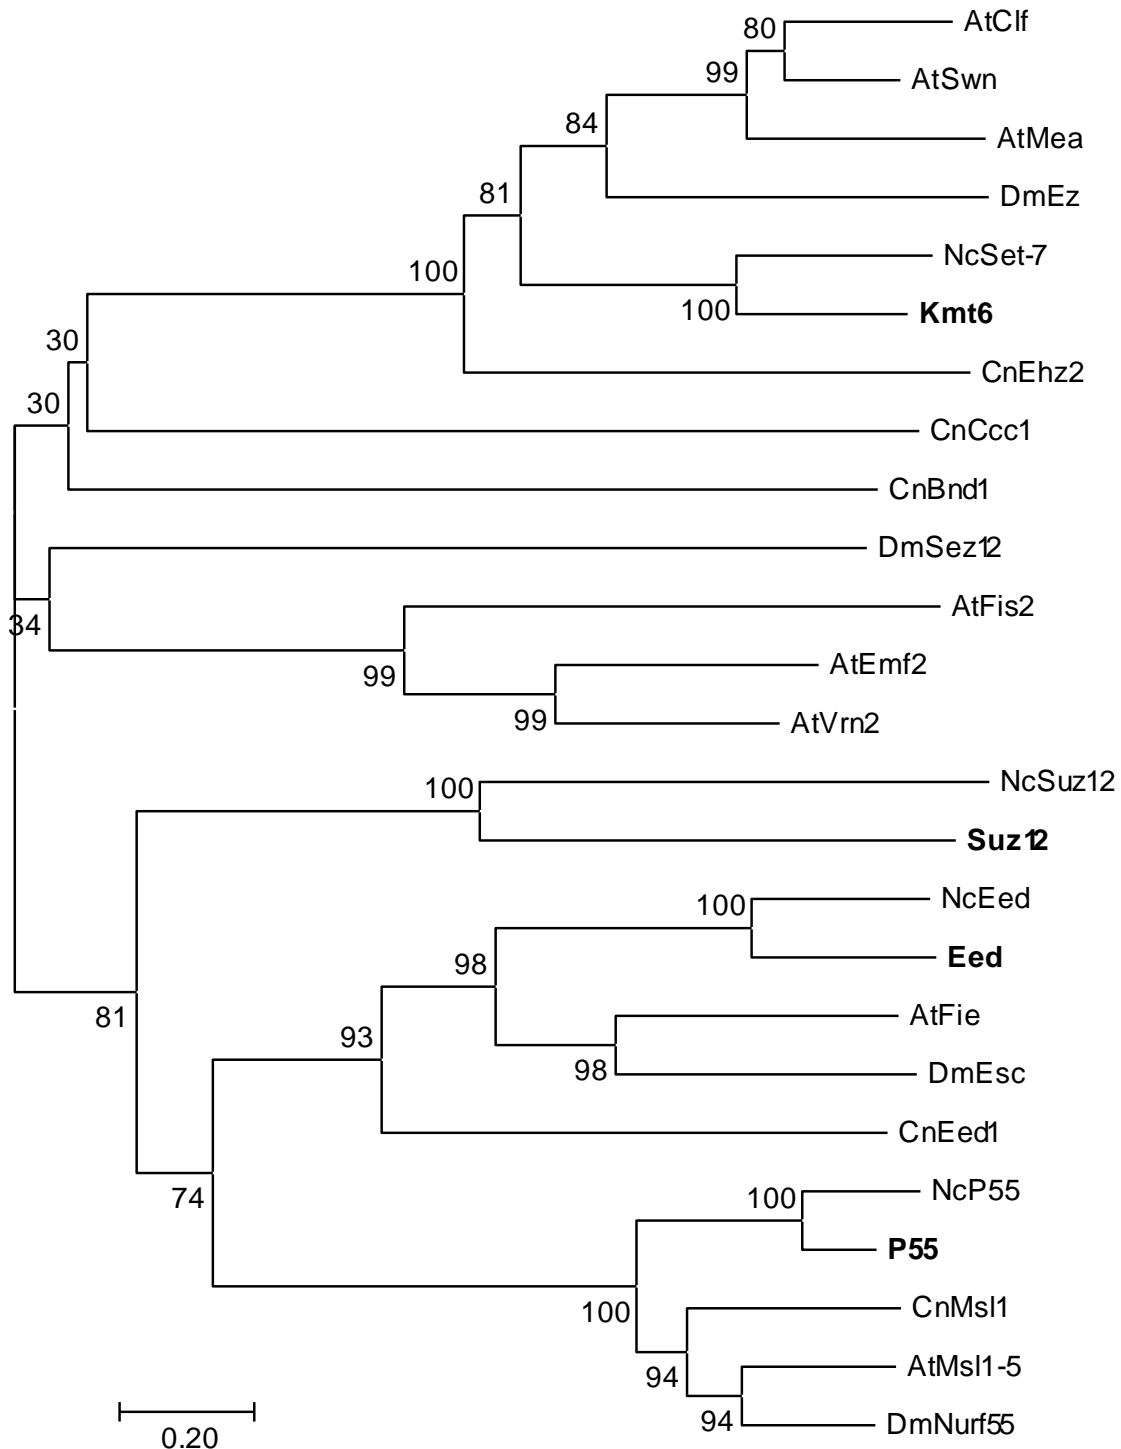

**Figure S1. Phylogenetic analysis of PRC2 components in *M. oryzae*.** The phylogenetic tree of PRC2 components from *M. oryzae* (highlighted with bold font), *N. crassa*, *A. thaliana*, and *D. melanogaster* was constructed by CLUSTAL\_W and MEGA 7 programs using neighbor-joining method with 1000 bootstrap replicates. Genbank accession numbers of these protein were listed in S1 Table.

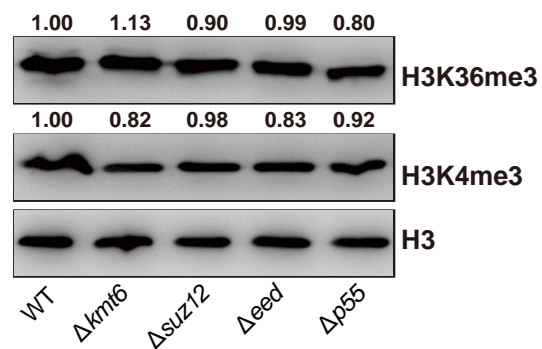

**Figure S2. Detection of H3K4me3 and H3K36me3 level in the deletion strains by Western blot analysis.**

The number at the top of band was the relative intensity calculated with Image J software. Two biological replicates were carried out with similar results.



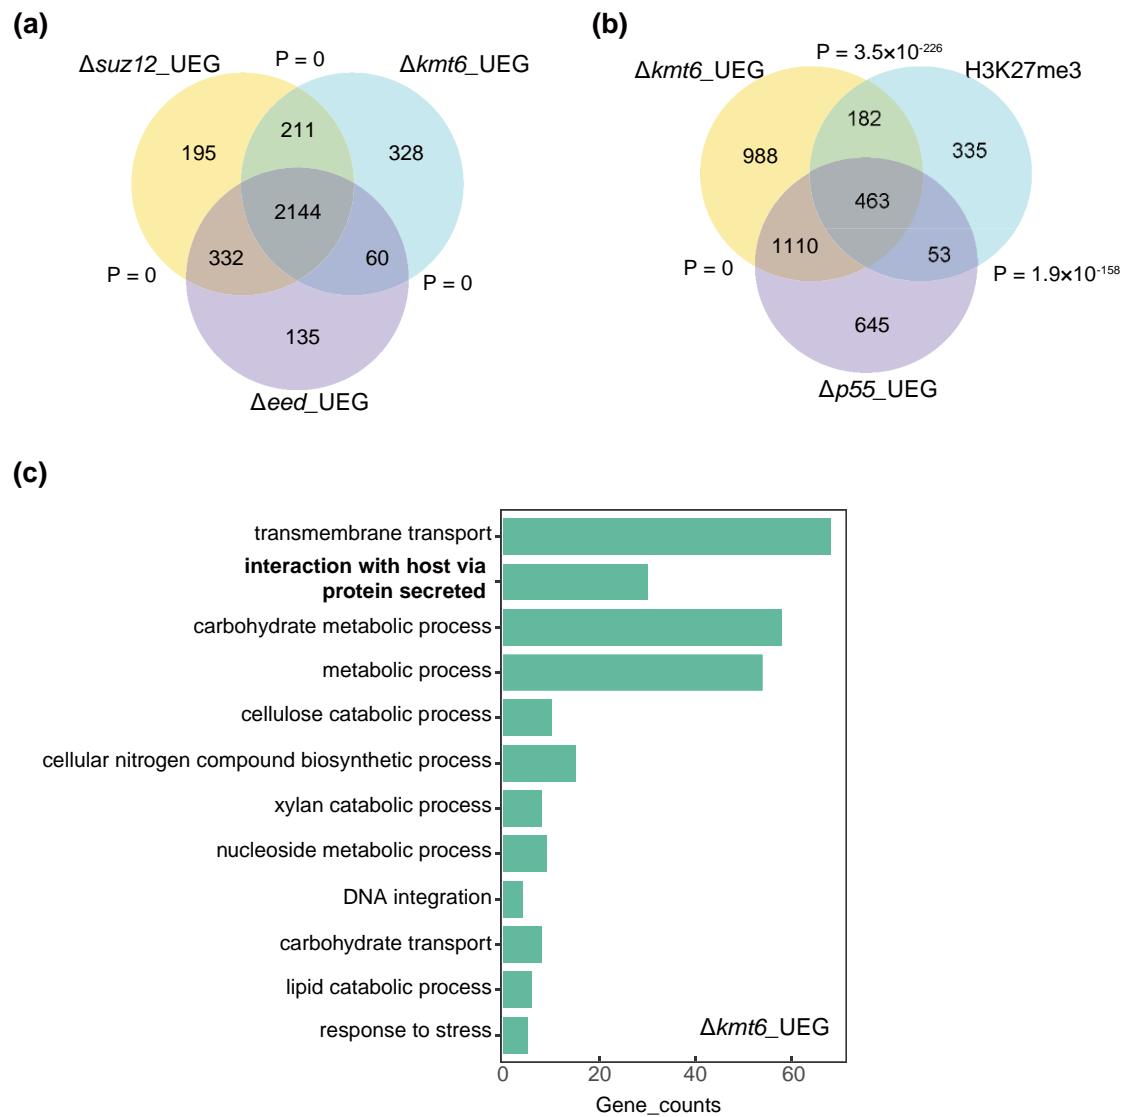

**Figure S3. Bioinformatics analysis of PRC2 subunits based on RNA-seq.**

(a) The Venn diagram showing statistically significant overlaps among genes sets of the  $\Delta kmt6$ -UEG,  $\Delta suz12$ -UEG and  $\Delta eed$ -UEG. P value for overlapping between gene sets was obtained by Fisher's exact test.

(b) The Venn diagram showing significant overlap among gene sets of  $\Delta kmt6$ -UEG,  $\Delta p55$ -UEG and H3K27me3 marked genes.

(c) GO analysis on gene sets of the  $\Delta kmt6$ -UEG.

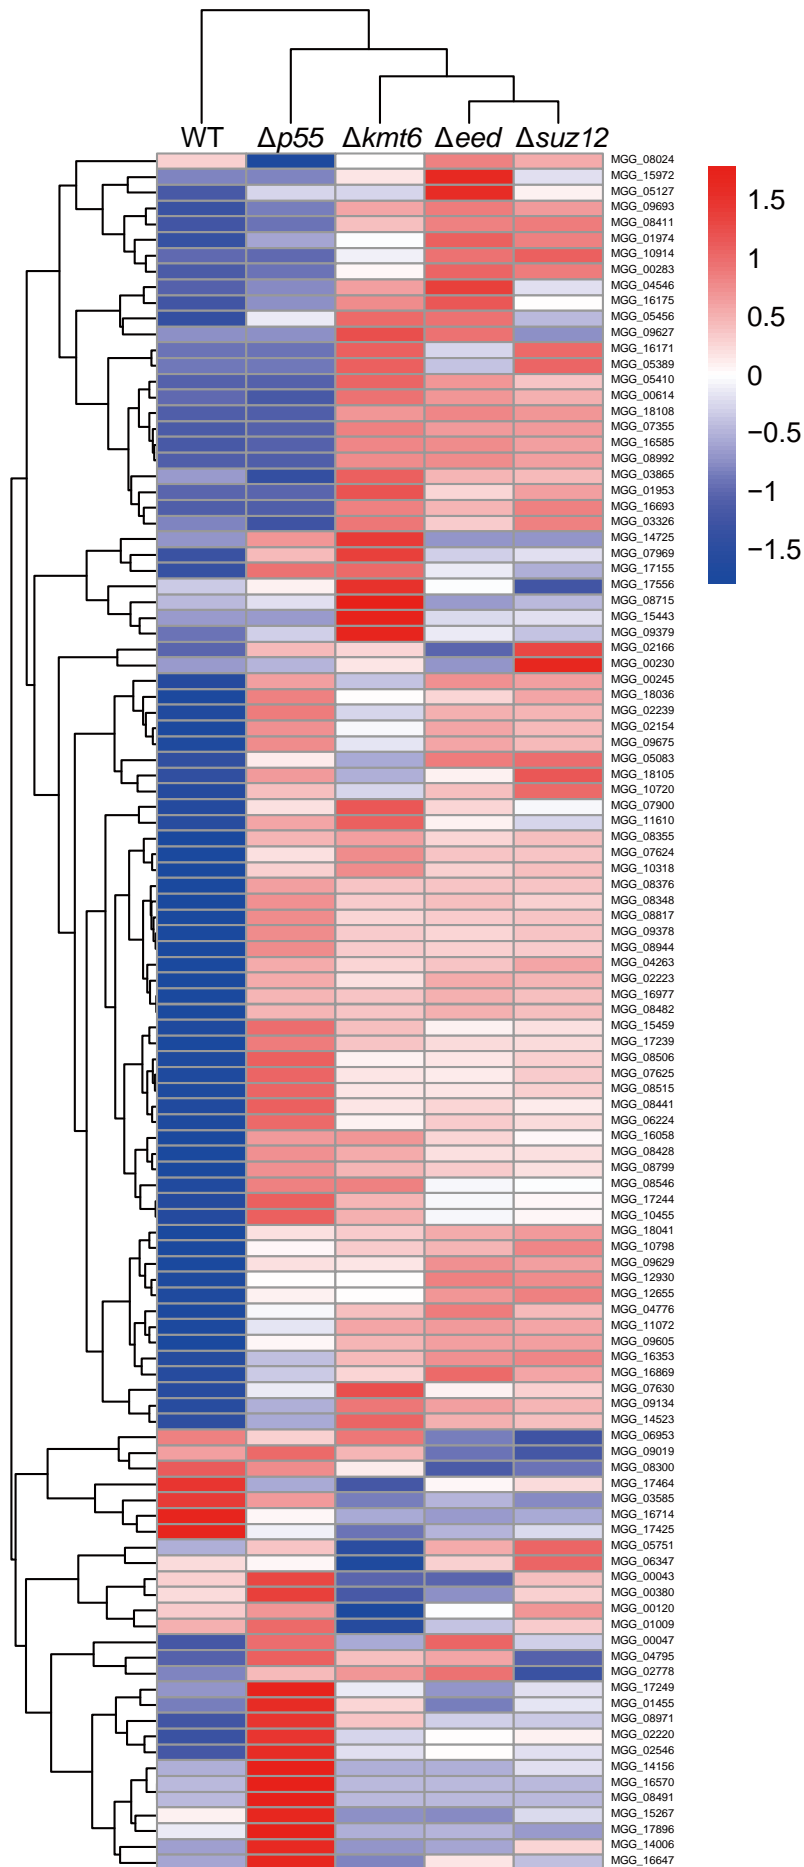

**Figure S4. Expression pattern of *effectors* in the *PRC2* mutants.**

Heat maps illustrated expression changes of genome-wide *effectors* in different *PRC2* mutant compared with that of WT B157. Three biological replications of RNA-Seq sequencing were conducted on independent samples.

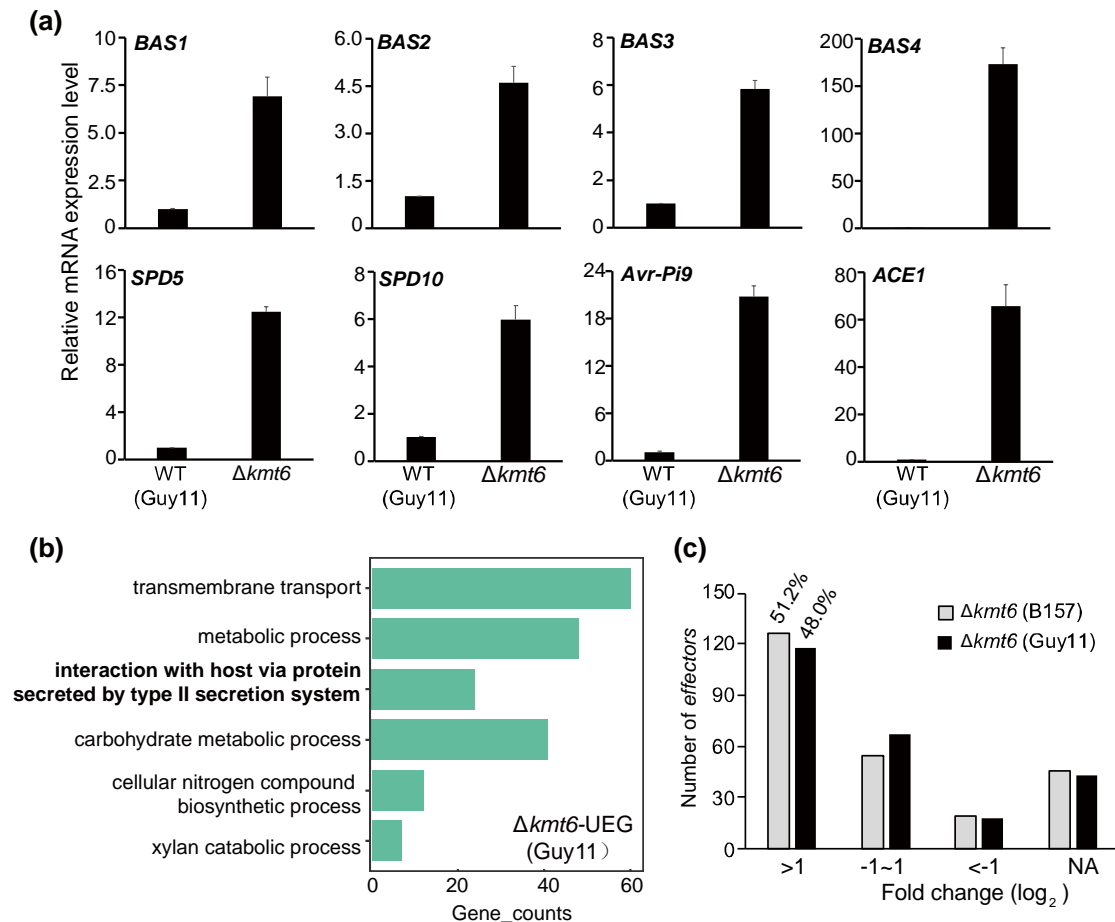

**Figure S5. Expression pattern of *effectors* in the  $\Delta kmt6$ (Guy11) mutant.**

(a) Relative expression level of representative *effectors* in Guy11 and  $\Delta kmt6$ (Guy11). Values are means  $\pm$  SD of three biological replicates.

(b) GO analysis on gene sets of the  $\Delta kmt6$ -UEG (Guy11).

(c) The distribution of putative 246 *effectors* based on the expression level change in the  $\Delta kmt6$ -UEG (B157) and  $\Delta kmt6$ -UEG (Guy11).

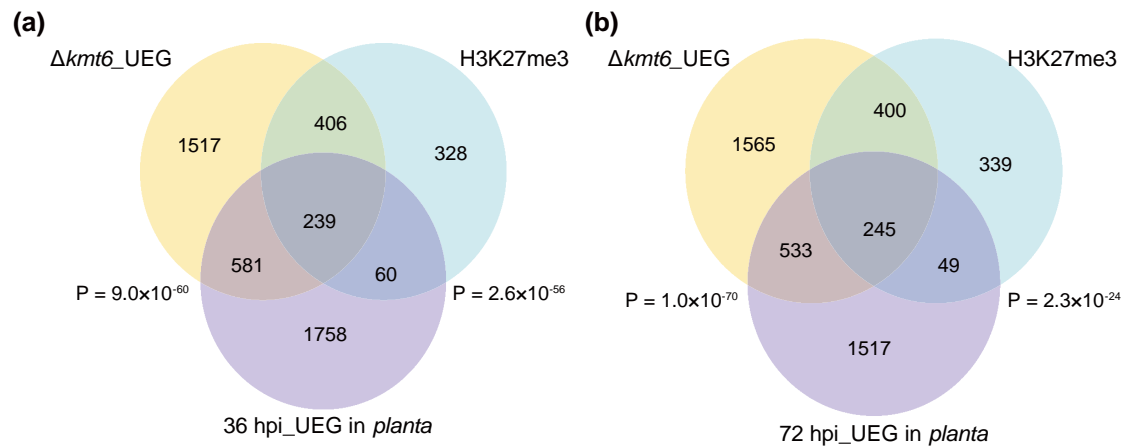

**Figure S6. Absence of H3K27me3 partially mimics host-derived signal.**

(a) The Venn diagram shows statistically significant overlaps among genes sets of the  $\Delta kmt6$ -UEG, 36 hpi\_UEG in *planta* and H3K27me3 marked genes.

(b) The Venn diagram represents statistically significant overlaps among genes sets of  $\Delta kmt6$ -UEG, 72 hpi\_UEG in *planta* and H3K27me3 marked genes.

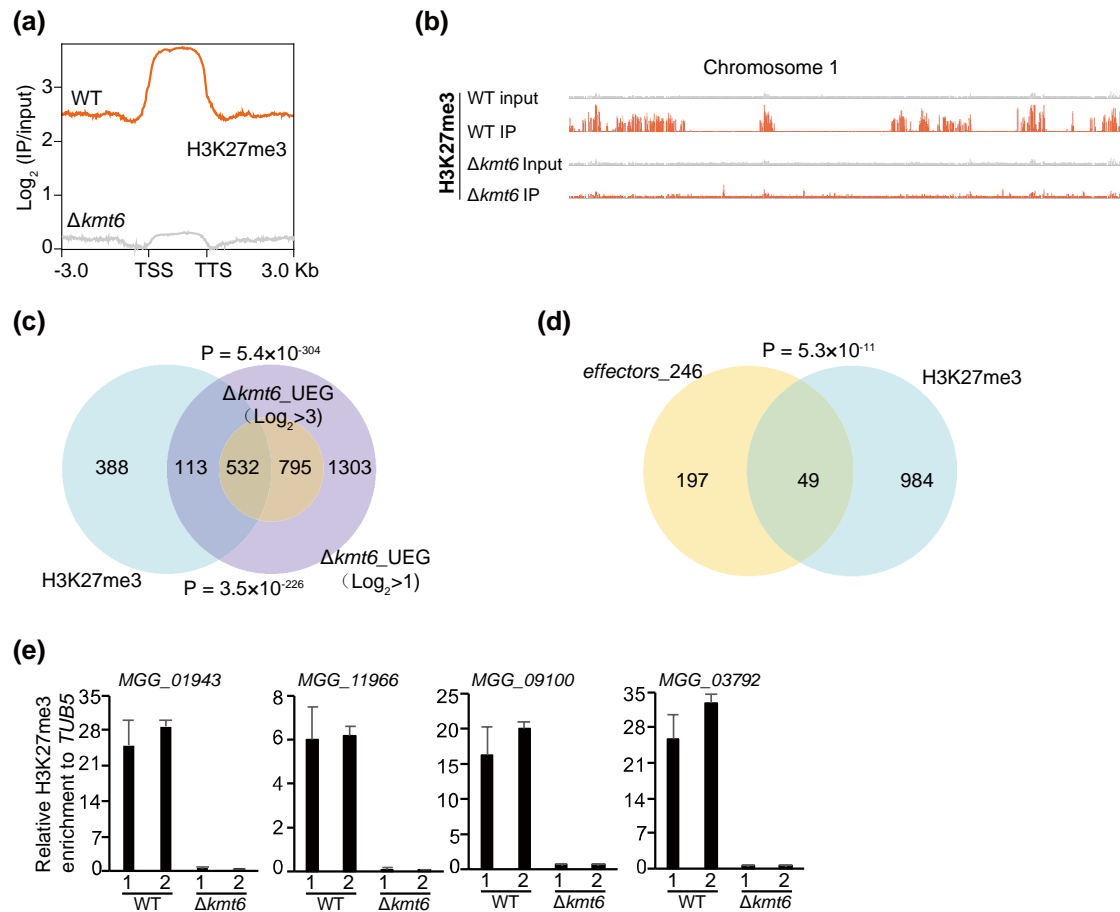

**Figure S7. H3K27me3 modification deposits on the chromatin of effectors and infection-specific genes during vegetative growth stage.**

(a) The average H3K27me3 occupancy within 3 Kb genomic regions flanking the summit of H3K27me3 peaks in the WT and  $\Delta kmt6$  strains.

(b) Genome browser views of H3K27me3 occupancy on the chromosome 1 in the WT and  $\Delta kmt6$  strains.

(c) The Venn diagram shows statistically significant overlaps between gene sets of H3K27me3 marked genes and the  $\Delta kmt6$ \_UEG with threshold of  $\text{Log}_2 > 1$  and  $\text{Log}_2 > 3$  respectively. P value with Fisher's exact test for overlapping between gene sets were labeled.

(d) The Venn diagram shows significant overlap among gene sets of putative 246 effectors and H3K27me3 marked genes.

(e) ChIP-qPCR verified the enrichment of H3K27me3 on the chromatin of infection-specific genes. The relative enrichments were calculated by relative quantitation of two biological repeats, which was standardized by internal control *TUB5*, and then compared with that of WT. Bar represents standard error from three technical repeats.

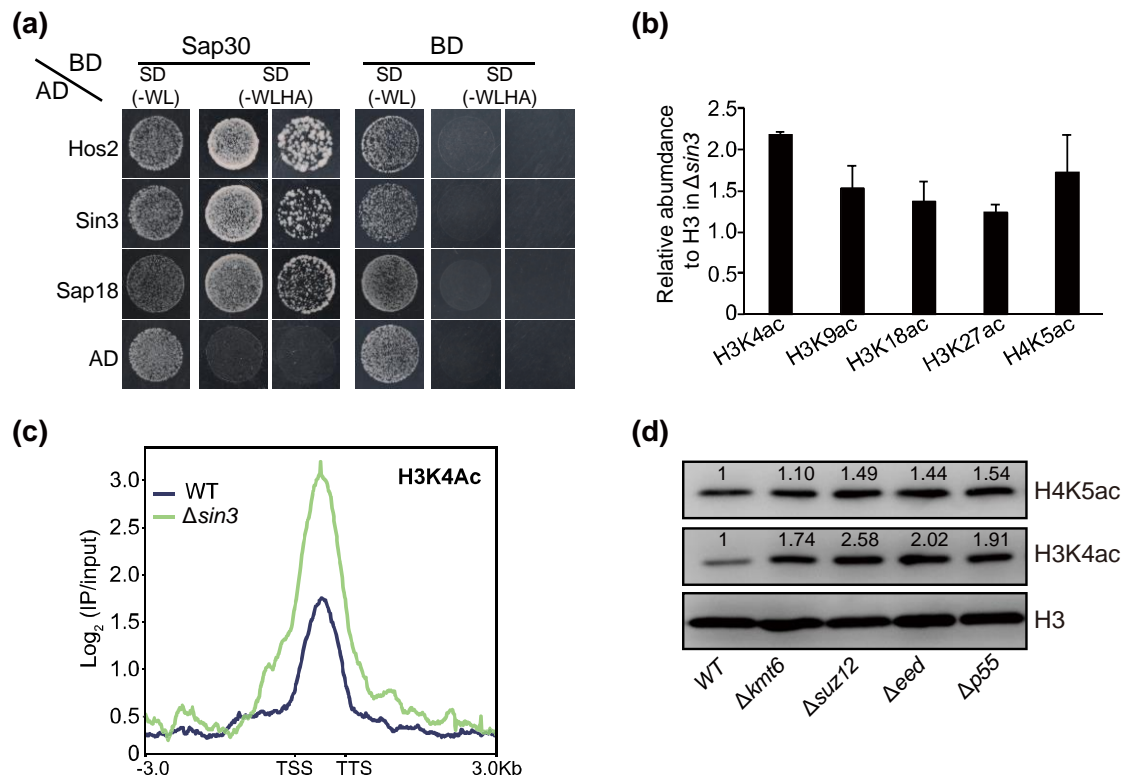

**Figure S8. Sin3 histone deacetylase complex contributes to histone deacetylation.**

(a) Yeast-two-hybrid assay of interaction between Sap30 and other Sin3-HDAC components Hos2, Sin3, or Sap18. The bait and prey plasmids were co-transformed into yeast strain Y2Hgold respectively, then the transformants were grown on basal medium SD (-WL) and selective medium SD (-WLHA).

(b) Relative abundance of examined protein blots in the WT and  $\Delta sin3$  strains. The standard error was obtained from three biological repetitions.

(c) Bolt representation of the average H3K4ac occupancy within 3 Kb genomic regions flanking the summit of H3K4ac peaks in the WT and  $\Delta sin3$  mutant.

(d) Western blotting assay detected the H4K5ac and H3K4ac modification in the deletion strains of PRC2 subunits. The number at the top of band was the relative intensity calculated with Image J. Two biological replicates were carried out with similar results.

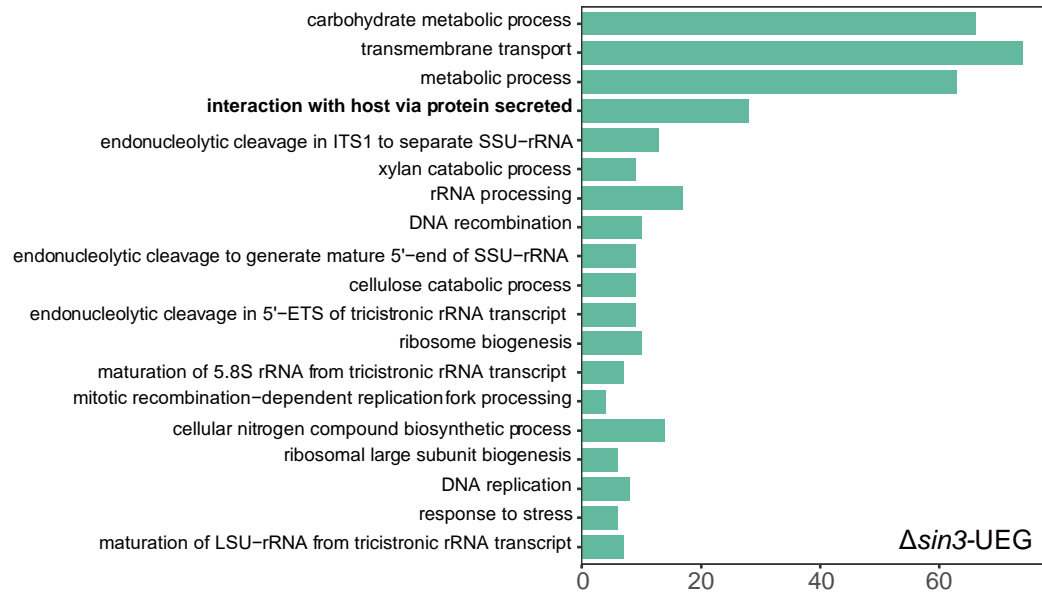

**Figure S9. GO analysis on gene sets of  $\Delta sin3$ -UEG.**



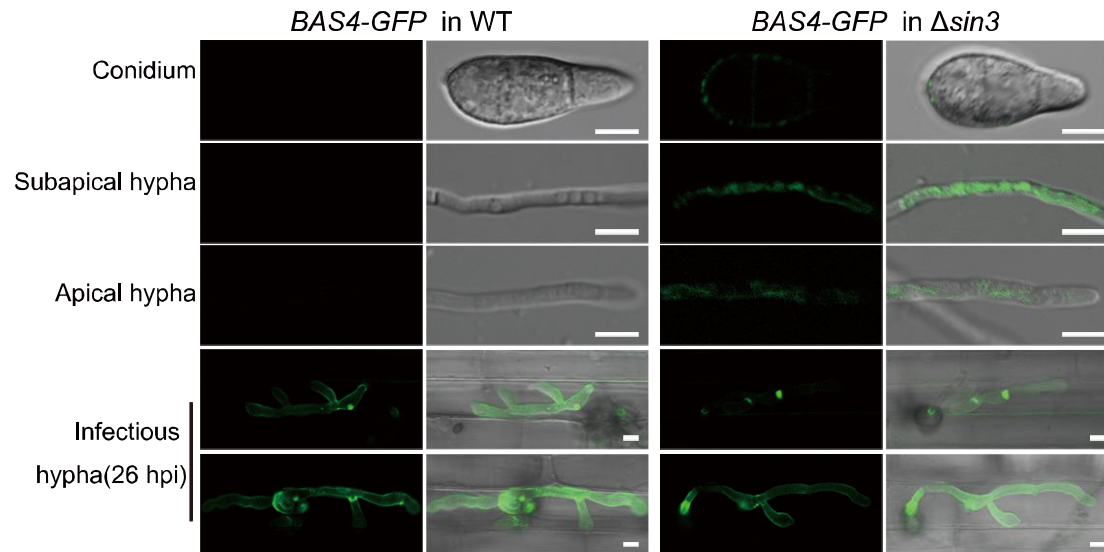

**Figure S10. Confocal microscopy-based subcellular localization of Bas4-GFP in the vegetative and *in planta* growth stages in the WT and  $\Delta sin3$  strains.**

In the WT, Bas4-GFP fluorescence was only presented in the *in planta* growth stage, while in the  $\Delta sin3$ , Bas4-GFP fluorescence could be detected during both vegetative and *in planta* growth stages, including the conidia, apical hypha, subapical hypha and invasive hypha. Bar = 5  $\mu$ m.

Table S1. Components of polycomb repressive complex in *M. oryzae*, *N. crassa*, *A. thaliana*, and *D. melanogaster*.

| Species                        | Subfamily                      | Protein name | Gene ID      | GenBank accession numbers |             |
|--------------------------------|--------------------------------|--------------|--------------|---------------------------|-------------|
| <i>Neurospora crassa</i>       | PRC2                           | NcSET-7      | NCU07496     | XP_965043.2               |             |
|                                |                                | NcEED        | NCU05300     | XP_962071.2               |             |
|                                |                                | NcSUZ12      | NCU05460     | XP_963451.3               |             |
|                                |                                | NcP55        | NCU06679     | XP_960994.2               |             |
| <i>Cryptococcus neoformans</i> | PRC2                           | CnEzh2       | CNAG_07553   | XP_012047965.1            |             |
|                                |                                | CnMsl1       | CNAG_03297   | XP_012051157.1            |             |
|                                |                                | CnBnd1       | CNAG_07433   | XP_012049647.1            |             |
|                                |                                | CnEed1       | CNAG_02345   | XP_012050093.1            |             |
|                                |                                | CnCcc1       | CNAG_00083   | XP_012046514.1            |             |
| <i>Magnaporthe oryzae</i>      | PRC2                           | MoSET-7      | MGG_00152    | XP_003718975.1            |             |
|                                |                                | MoSUZ12      | MGG_03169    | XP_003716821.1            |             |
|                                |                                | MoEED        | MGG_06028    | XP_003711877.1            |             |
|                                |                                | MoP55        | MGG_07323    | XP_003715557.1            |             |
| <i>Arabidopsis thaliana</i>    | PRC2                           | AtCLF        | AT2G23380    | NP_179919.1               |             |
|                                |                                | AtMEA        | AT1G02580    | NP_563658.1               |             |
|                                |                                | AtSWN        | AT4G02020    | NP_567221.1               |             |
|                                |                                | AtFIE        | AT3G20740    | NP_188710.1               |             |
|                                |                                | AtEMF2       | AT5G51230    | NP_199936.2               |             |
|                                |                                | AtVRN2       | AT4G16845    | NP_567517.1               |             |
|                                |                                | AtFIS2       | AT2G35670    | NP_565815.2               |             |
|                                |                                | AtMSI1-5     | AT5G58230    | NP_200631.1               |             |
|                                |                                | PRC1         | AtEMF1       | AT5G11530                 | NP_196714.1 |
|                                |                                |              | AtRING1A     | AT5G44280                 | NP_199241.2 |
|                                | AtRING1B                       |              | AT1G03770    | NP_171873.2               |             |
|                                | AtLHP1                         |              | AT5G17690    | NP_197271.1               |             |
|                                | AtBMI1A                        |              | AT2G30580    | NP_565702.1               |             |
|                                | AtBMI1B                        |              | AT1G06770    | NP_973775.1               |             |
|                                | AtBMI1C                        |              | AT3G23060    | NP_188946.2               |             |
|                                | <i>Drosophila melanogaster</i> | PRC2         | DmEz         | Dmel_CG6502               | NP_524021.2 |
|                                |                                |              | DmESC        | Dmel_CG14941              | NP_477431.1 |
| DmSUZ12                        |                                |              | Dmel_CG8013  | NP_652059.1               |             |
| DmCaf                          |                                |              | Dmel_CG4236  | NP_524354.1               |             |
| PRC1                           |                                | DmJARID2     | Dmel_CG3654  | NP_648324.1               |             |
|                                |                                | DmPCL        | Dmel_CG5109  | NP_476672.1               |             |
|                                |                                | DmPH         | Dmel_CG18412 | NP_476871.2               |             |
|                                |                                | DmPSC        | Dmel_CG3886  | NP_523725.2               |             |
|                                |                                | DmPC         | Dmel_CG32443 | NP_524199.1               |             |
|                                |                                | DmRing       | Dmel_CG5595  | NP_477509.1               |             |
| DmKDM2                         | Dmel_CG11033                   | NP_649864.2  |              |                           |             |

Table S2. Primers used in this study.

| Primer name | Sequence (5'-3')                         | Use                                                                               |
|-------------|------------------------------------------|-----------------------------------------------------------------------------------|
| KMT6-5F     | AATTGAATTC CGCATGGAGAACGTGCGATG          | amplifying <i>KMT6</i> 5' flanking sequence for gene deletion ( <i>pFGL821</i> )  |
| KMT6-5R     | AATTGGTACC GGCCTTGTCACCTTTGCTCCCT        |                                                                                   |
| KMT6-3F     | AATCTGCGAG GAGCAGTCGAGCGCACGGA           | amplifying <i>KMT6</i> 3' flanking sequence for gene deletion                     |
| KMT6-3R     | AATTAAGCTT CACCACGGTTGCTGGAGAGTACG       |                                                                                   |
| SUZ12-5F    | CGGAATTCATCGTTGCTCGGTGTTGC               | amplifying <i>SUZ12</i> 5' flanking sequence for gene deletion ( <i>pFGL821</i> ) |
| SUZ12-5R    | GGGGTACCTGGTGCCTTAAGCATGAGA              |                                                                                   |
| SUZ12-3F    | AACTGCAGGCCGAAACGTTACACCAC               | amplifying <i>SUZ12</i> 3' flanking sequence for gene deletion                    |
| SUZ12-3R    | CCCAGCTTTCTCGTGAAGAGAGTGCTGG             |                                                                                   |
| EED-5F      | CGGAATTCATTCGGAATTCGCGACAGT              | amplifying <i>EED</i> 5' flanking sequence for gene deletion ( <i>pFGL821</i> )   |
| EED-5R      | GGGGTACCCGGTCCGATCCACGAAAAGA             |                                                                                   |
| EED-3F      | AACTGCAGTTGTCGCCGGAGTAAGAAC              | amplifying <i>EED</i> 3' flanking sequence for gene deletion                      |
| EED-3R      | CCCAGCTTCGAAATTCGATGCGCGAGG              |                                                                                   |
| P55-5F      | CGGAATTCATGAATGGCGGGAGTCTG               | amplifying <i>P55</i> 5' flanking sequence for gene deletion ( <i>pFGL821</i> )   |
| P55-5R      | GGGGTACCTGCAATGGCCAATGAACTCT             |                                                                                   |
| P55-3F      | AACTGCAGTGCCGAGTCGATCGTTAAGC             | amplifying <i>P55</i> 3' flanking sequence for gene deletion                      |
| P55-3R      | CCCAGCTTTGTCGACCTTGCAAGCTGTT             |                                                                                   |
| SIN3-5F     | GGAGAACTCGAGAATTC TCAAGGCGAGTTAGGGCAG    | amplifying <i>SIN3</i> 5' flanking sequence for gene deletion ( <i>pFGL821</i> )  |
| SIN3-5R     | GAGTTCAGGCTTTTTCATATCTCGGAGGGTGGTTC      |                                                                                   |
| SIN3-3F     | TCCGAGGGCAAAGAAATAGCTTTGCAAGTACGAGCTGC   | amplifying <i>SIN3</i> 3' flanking sequence for gene deletion                     |
| SIN3-3R     | CAAGCTTGCATGCCTGCAGATTCTCGGTTGTGGCCCTC   |                                                                                   |
| SAP18-5F    | GGAGAACTCGAGAATTCGTTGAGGGATCGGCACG       | amplifying <i>SAP18</i> 5' flanking sequence for gene deletion ( <i>pFGL821</i> ) |
| SAP18-5R    | GAGTTCAGGCTTTTTCATGCAAGCGTCTTGATGTATT    |                                                                                   |
| SAP18-3F    | TCCGAGGGCAAAGAAATAGTCTGGGAAGCTGAGCTTT    | amplifying <i>SAP18</i> 3' flanking sequence for gene deletion                    |
| SAP18-3R    | CAAGCTTGCATGCCTGCAGGGAGTTAGGTGAAGCAAGTC  |                                                                                   |
| SAP30-5F    | GGAGAACTCGAGAATTCAGTAGTCTGGGTAAGCGATACCC | amplifying <i>SAP30</i> 5' flanking sequence for gene deletion ( <i>pFGL821</i> ) |
| SAP30-5R    | GAGTTCAGGCTTTTTCATGCTCGGCTGGTGTATCTGGG   |                                                                                   |
| SAP30-3F    | TCCGAGGGCAAAGAAATAGTGGGCGTCTGGACATAGCTT  | amplifying <i>SAP30</i> 3' flanking sequence for gene deletion                    |
| SAP30-3R    | CAAGCTTGCATGCCTGCAGGGTCAATCGCCCTATTCC    |                                                                                   |
| SIN3bp-5F   | GGAGAACTCGAGAATTCATTCACCTTGATCCAAT       | amplifying <i>SAP30</i> 5' flanking sequence for gene deletion ( <i>pFGL821</i> ) |
| SIN3bp-5R   | GAGTTCAGGCTTTTTCATGGGAGCAAGATGCCTCCG     |                                                                                   |
| SIN3bp-3F   | TCCGAGGGCAAAGAAATAGTCTGGGAAGCTGAGCTTT    | amplifying <i>SAP30</i> 3' flanking sequence for gene deletion                    |
| SIN3bp-3R   | CAAGCTTGCATGCCTGCAGAACGTATTTACCAAGCTG    |                                                                                   |
| HOS2-5F     | AGTGAATTCGAAAGGAGGCTGGAGATGAA            | amplifying <i>HOS2</i> 5' flanking sequence for gene deletion ( <i>pFGL821</i> )  |
| HOS2-5R     | AGTGGATCCGTACTTTGGGCTAAAGTCAAAGG         |                                                                                   |
| HOS2-3F     | AGTGTCCAGCAGAAGAGTCTTTCTCTGCACCC         | amplifying <i>HOS2</i> 3' flanking sequence for gene deletion                     |
| HOS2-3R     | AGTAAAGCTTGGCCCTGGTCCCATATCCATTC         |                                                                                   |
| KMT6-TF     | AATCTCGTATAGAAGCACGCCTAGTT               | transformants screening                                                           |
| KMT6-IN-F   | GCCGAGCTCGTAGCAACGC                      |                                                                                   |
| KMT6-IN-R   | AGGGCCCGTCGTGTATGCAT                     |                                                                                   |
| SUZ12-TF    | AACAGGCTCGTCTGGTATCAAGAGAA               | transformants screening                                                           |
| SUZ12-IN-F  | TTCTTGACATAGAGAAGTGGCGTCT                |                                                                                   |
| SUZ12-IN-R  | GACATTGTCGCCGTAGAAGGAGAC                 |                                                                                   |

|               |                                              |                                                                         |
|---------------|----------------------------------------------|-------------------------------------------------------------------------|
| EED-TF        | AACCTGCTTACGACGAGCTGCTC                      | transformants screening                                                 |
| EED-IN-F      | GGGCTACGTCGCCAAGATCAA                        |                                                                         |
| EED-IN-R      | ATGCGCCTTGTCACCTAAGTTCCTT                    |                                                                         |
| P55-TF        | AAATGGGAACGTCATCTACCATC                      | transformants screening                                                 |
| P55-IN-F      | AACTATCGCATTCACCGTGCCT                       |                                                                         |
| P55-IN-R      | GGCAAAAGTCTAGTGCCTGATGG                      |                                                                         |
| SIN3-TF       | ATCGCCGTATTATCGGCGA                          | transformants screening                                                 |
| SIN3-IN-F     | CGGCTTCGTTGAATGGAAGTTCT                      |                                                                         |
| SIN3-IN-R     | TCATTGGTTCAGGCACAATGGG                       |                                                                         |
| SAP18-TF      | GAAGGCAGTCTTCAGCGATG                         | transformants screening                                                 |
| SAP18-IN-F    | GCGTTTCACAGTTAGTGCTTTAC                      |                                                                         |
| SAP18-IN-R    | GCGACAGATCCGCTCCTCCAGA                       |                                                                         |
| SAP30-TF      | GGCTCAGATATCGTTTTGGGCC                       | transformants screening                                                 |
| SAP30-IN-F    | TCACGGCAATGGCAAGGACAA                        |                                                                         |
| SAP30-IN-R    | CGTTGCGACTTTGTGGACGAA                        |                                                                         |
| SIN3bp-TF     | GATTCGGTCGTATTGGTCGAGC                       | transformants screening                                                 |
| SIN3bp-IN-F   | TCCTGTGACCAAGAATCACCTT                       |                                                                         |
| SIN3bp-IN-R   | AACGACATCACCAATTGATCCAC                      |                                                                         |
| HOS2-TF       | CGACGAGTGTCTAGCCAGATTG                       | transformants screening                                                 |
| HOS2-IN-F     | GACCTCAAGTTTAACTCCGAGG                       |                                                                         |
| HOS2-IN-R     | GCCAAAGAGGATCATGGGAAT                        |                                                                         |
| KMT6-GFP-5f   | GCCGTTTACGCGAACCTCA                          | construction of <i>KMT6-GFP</i> and complementation ( <i>pFGL820</i> )  |
| KMT6-GFP-5r   | AATTGGTACCAGGACCTCTACGATATCGTACAGG           |                                                                         |
| KMT6-com-if   | GAGAATTCGAGCTCGGTACCCTCGGTCGAGAATTGACTT      |                                                                         |
| KMT6-com-iR   | GCAGGTCGACTCTAGATGGAATGTGCGGGAATAC           |                                                                         |
| SUZ12-c-5f    | TATGGAGAACTCGAGAATTCATCTCGTTGTCTCGGTGTTGGG   | construction of <i>SUZ12-GFP</i> and complementation ( <i>pFGL820</i> ) |
| SUZ12-c-5r    | TGCTCACCATCAAGTCCACACAGTCATTACATAGCC         |                                                                         |
| SUZ12-GFP-    |                                              |                                                                         |
| Trpcf         | TGTGGACTTGATGGTGAGCAAGGGCGAGG                |                                                                         |
| SUZ12-GFP-    |                                              |                                                                         |
| Trper         | GACTCTAGAACTAGTGGATCCCGAGCCCTCTAAACAAGTGTACC |                                                                         |
| SUZ12-c-3f    | GAATTGCATGTCGACCTGCAGGGGCTATTGTAGCCGTGACTATC |                                                                         |
| SUZ12-c-3r    | ACGACGGCCAGTGCCAAGCTTTCTCGTGAAGAGAGTGCTGGAA  |                                                                         |
| EED-c-5f      | TATGGAGAACTCGAGAATTCATTTCCGACTTCGGCACAGTC    | construction of <i>EED-GFP</i> and complementation ( <i>pFGL820</i> )   |
| EED-c-5r      | CCCTTGCTCACCATTTCTATGACTACCCCTTGGAACTGGT     |                                                                         |
| EED-GFP-Trpcf | CATAGAATGGTGAGCAAGGGCGAGG                    |                                                                         |
| EED-GFP-Trper | GACTCTAGAACTAGTGGATCCCGAGCCCTCTAAACAAGTGTACC |                                                                         |
| EED-c-3f      | GAATTGCATGTCGACCTGCAGATCCGGGGTGTGTTTTTTGG    |                                                                         |
| EED-c-3r      | ACGACGGCCAGTGCCAAGCTTCGAAATTCGATGCGCGAG      |                                                                         |
| P55-c-5f      | CGAGAATTCGAGCTCGGTACCAATGAATGGGCGGAGTCTG     | construction of <i>P55-GFP</i> and complementation ( <i>pFGL820</i> )   |
| P55-c-5r      | TCCTCGCCCTTGCTCACCATGGGGCCAGCTCGTCCAC        |                                                                         |
| P55-GFP-Trpcf | ATGGTGAGCAAGGGCGAGG                          |                                                                         |
| P55-GFP-Trper | CGTTGGCACCTCGACTCTAGACGAGCCCTCTAAACAAGTGTACC |                                                                         |
| P55-c-3f      | GAATTGCATGTCGACCTGCAGAGGACGGTCCAGTCCGA       |                                                                         |

|             |                                                |                                                               |
|-------------|------------------------------------------------|---------------------------------------------------------------|
| P55-c-3F    | ACGACGGCCAGTGCCAAGCTTTGTCGACCTTGTCAGCTGTTTC    |                                                               |
| P55-c-F     | AGTCTCGAGAGCCCTGCCATTCGGTGTC                   |                                                               |
| P55-c-R     | AGTGGATCCTGACAGACGTTTGTGGTGGGA                 |                                                               |
| SIN3-GFP-F  | TATTATGGAGAACTCGAGAGCAAGGAAGCCAGAAAGCG         | construction of <i>SIN3-GFP</i> and complementation (pFGL820) |
| SIN3-GFP-R  | CACCATGGTACCAGCTCTGCAGAAGACCCAGCACCG           |                                                               |
| flagKMT6F   | CGACGATAAGCTCGAGACGGCAAGCTCGTGCCCT             | construction of <i>FLAG-KMT6</i> (pFGL822)                    |
| flagKMT6R   | TGTTTGATGAGCTGGGTACCTCAAGGACCTCTACGATATC       |                                                               |
| flagSUZ12F  | CGACGATAAGCTCGAGACTCCGCACGGCTTCAGACG           | construction of <i>FLAG-SUZ12</i> (pFGL822)                   |
| flagSUZ12R  | TGTTTGATGAGCTGGGTACCTTACAAGTCCACACAGTCAT       |                                                               |
| flagEEDF    | CGACGATAAGCTCGAGCCGGTGGCGACGCGTCGGG            | construction of <i>FLAG-EED</i> (pFGL822)                     |
| flagEEDR    | TGTTTGATGAGCTGGGTACCTATCTATGACTACCTTTG         |                                                               |
| flagP55F    | CGACGATAAGCTCGAGGACCTCTCCAGCCATGGA             | construction of <i>FLAG-P55</i> (pFGL822)                     |
| flagP55R    | TGTTTGATGAGCTGGGTACCCTAGGGGCCAGCTCGTCCA        |                                                               |
| flagSIN3F   | TGACGACGATAAGCTCGAGATGAATTCTCAACGGTCCCACG      | construction of <i>FLAG-SIN3</i> (pFGL822)                    |
| flagSIN3R   | GGAACAAAAGCTGGGTACCTTATGCAGAAGACCCAGCACC       |                                                               |
| flagSAP18F  | TGACGACGATAAGCTCGAGATGATGGAGATGGACAGGAACG      | construction of <i>FLAG-SAP18</i> (pFGL822)                   |
| flagSAP18R  | GGAACAAAAGCTGGGTACC TCAGGGGATTTCCCGCGAT        |                                                               |
| flagSAP30F  | TGACGACGATAAGCTCGAGATGCCACCAGCAAAAGCACG        | construction of <i>FLAG-SAP30</i> (pFGL822)                   |
| flagSAP30R  | GGAACAAAAGCTGGGTACCTCAGTCTCTCTGCGTGTCTCG       |                                                               |
| flagSIN3bpF | TGACGACGATAAGCTCGAGATGGCAACCATGGCAACTGCTAC     | construction of <i>FLAG-SIN3</i> (pFGL822)                    |
| flagSIN3bpR | GGAACAAAAGCTGGGTACCTTATACAGAGCCGAGTTGAAGTAGAGC |                                                               |
| flagHOS2F   | TGACGACGATAAGCTCGAGATGGATGCAGACTCATAAGATATCG   | construction of <i>FLAG-HOS2</i> (pFGL822)                    |
| flagHOS2R   | GGAACAAAAGCTGGGTACCTTAAAACCTCATGGCTTGACCAAC    |                                                               |
| qBAS1-F     | CCGTCTATCGCGGCTGAAGATTAT                       | amplifying <i>MoBAS1</i> for RT-PCR                           |
| qBAS1-R     | CGGGTAATAATTCTCCACCCGICTA                      |                                                               |
| qBAS2-F     | AGGGAGTCTGCTCCAACGAAGTCG                       | amplifying <i>MoBAS2</i> for RT-PCR                           |
| qBAS2-R     | TGCTTCTTGACCTGCTCCTTGGC                        |                                                               |
| qBAS3-F     | TCCCAGACCCTTGCCGTACTCAG                        | amplifying <i>MoBAS3</i> for RT-PCR                           |
| qBAS3-R     | CAGCGCCGTTCAGGTTGCAGA                          |                                                               |
| qBAS4-F     | GCTCAAGAAGAACGGCAATGCG                         | amplifying <i>MoBAS4</i> for RT-PCR                           |
| qBAS4-R     | GGGATAGACGAGCCAGTAGCGCC                        |                                                               |
| qSPD5-F     | TTAACTTCTTCGGCCACAAGACG                        | amplifying <i>MoSPD5</i> for RT-PCR                           |
| qSPD5-R     | GAGGCCGTCGATTTGCAGTCCTC                        |                                                               |
| qSPD8-F     | AGGGACGGTACGAAATTCGACACG                       | amplifying <i>MoSPD8</i> for RT-PCR                           |
| qSPD8-R     | GGCCGCGATATTCGAGGTCT                           |                                                               |
| qSPD10-F    | CAAGGCCACCAACACCCGACCT                         | amplifying <i>MoSPD10</i> for RT-PCR                          |
| qSPD10-R    | TGCAGGCCCTTTCAGGTTCT                           |                                                               |
| qAvr-PiK-F  | CAACCTGGTATTCTGTACCCGAAT                       | amplifying <i>MoAvr-PiK</i> for RT-PCR                        |
| qAvr-PiK-R  | CCCAGTTGGACCAACTTTCATGTC                       |                                                               |
| qAvr-PiZt-F | CCAAAGAGGCTGGTCGCGATT                          | amplifying <i>MoAvr-PiZt</i> for RT-PCR                       |
| qAvr-PiZt-R | GAGAGAACATCAGTGGACGTCCC                        |                                                               |
| qAvr-Pi9-F  | GGCCGAAGGTGACGCCAAGAT                          | amplifying <i>MoAvr-Pi9</i> for RT-PCR                        |
| qAvr-Pi9-R  | TTGGCACCAGCCATCATCGCA                          |                                                               |
| qACE1-F     | GAGGGCACCAATAGCCTCGACCT                        | amplifying <i>MoACE1</i> for RT-PCR                           |

|              |                                                   |                                                                           |
|--------------|---------------------------------------------------|---------------------------------------------------------------------------|
| qACE1-R      | CAGCGACGTTCTCGACCCGACAC                           |                                                                           |
| qHEG13-F     | TTGCTCACAAACGGTCACACG                             | amplifying <i>MoHEG13</i> for RT-PCR                                      |
| qHEG13-R     | TGGTTGTCCGGCAACACGTTG                             |                                                                           |
| qβ-Tubulin-F | CTGCCATCTCCGTGGAAAGG                              | analysis the expression level of <i>β-tubulin</i> gene of <i>M.oryzae</i> |
| qβ-Tubulin-R | GACGAAGTACGACGAGTTCTTG                            |                                                                           |
| ChIP-qMPG1-F | ACTAACTGACTGAGTACTGAGGGACTT                       | amplifying <i>MoBAS1</i> for ChIP-qPCR                                    |
| ChIP-qMPG1-R | GTGAGCTTTGGGATGATGAGAAGAG                         |                                                                           |
| ChIP-BAS3-F  | CTTGAAGACAGACCAGCAAATCGC                          | amplifying <i>MoBAS2</i> for ChIP-qPCR                                    |
| ChIP-BAS3-R  | ATGGCAAAGGAGACGGTGGAGA                            |                                                                           |
| ChIP-BAS4-F  | CTCATTCTCAGCAATCGCCATCC                           | amplifying <i>MoBAS3</i> for ChIP-qPCR                                    |
| ChIP-BAS4-R  | TCTGCACTGTTGTTGTCGGGGTA                           |                                                                           |
| ChIP-SPD5-F  | CCAGACATATCTACCACCAAGAAGGC                        | amplifying <i>MoBAS4</i> for ChIP-qPCR                                    |
| ChIP-SPD5-R  | ATGGCGGCAATGTGGAGGATT                             |                                                                           |
| ChIP-SPD10-F | CACCCGCAACGACAAAAAAGC                             | amplifying <i>MoSPD5</i> for ChIP-qPCR                                    |
| ChIP-SPD10-R | CCAGGAGCAAGGGGAGAACGA                             |                                                                           |
| ChIP-Tub5-F  | GTTGCAGCTAGCACAGACCA                              | amplifying <i>Moβ-tubulin</i> for ChIP-qPCR                               |
| ChIP-Tub5-R  | GTCGGGATTGATTGGATTG                               |                                                                           |
| AD-KMT6F     | GCCATGGAGGCCAGTGAATTCATGACGGGCAAGCTCGGT           | construction of AD- <i>KMT6</i> (pGADT7)                                  |
| AD-KMT6R     | CAGCTCGAGCTCGATGGATCCTCAAGGACCTCTACGATATCGTACA    |                                                                           |
| BD-KMT6F     | ATGGCCATGGAGGCCGAATTCATGACGGGCAAGCTCGGT           | construction of BD- <i>KMT6</i> (pGBKT7)                                  |
| BD-KMT6R     | CCGCTGCAGGTCGACGGATCCTCAAGGACCTCTACGATATCGTACA    |                                                                           |
| AD-SUZ12F    | GCCATGGAGGCCAGTGAATTCATGACTCCGCACGGCTTCA          | construction of AD- <i>SUZ12</i> (pGADT7)                                 |
| AD-SUZ12R    | CAGCTCGAGCTCGATGGATCCTTACAAGTCCACACAGTCATTACATAGC |                                                                           |
| BD-SUZ12F    | ATGGCCATGGAGGCCGAATTCATGACTCCGCACGGCTTCA          | construction of BD- <i>SUZ12</i> (pGBKT7)                                 |
| BD-SUZ12R    | CCGCTGCAGGTCGACGGATCCTTACAAGTCCACACAGTCATTACATAGC |                                                                           |
| AD-EEDF      | GCCATGGAGGCCAGTGAATTCATGGCCGGTGGCGACGCG           | construction of AD- <i>EED</i> (pGADT7)                                   |
| AD-EEDR      | CAGCTCGAGCTCGATGGATCCCTATCTATGACTACCTTTGGAAGTGG   |                                                                           |
| BD-EEDF      | ATGGCCATGGAGGCCGAATTCATGGCCGGTGGCGACGCG           | construction of BD- <i>EED</i> (pGBKT7)                                   |
| BD-EEDR      | CCGCTGCAGGTCGACGGATCCCTATCTATGACTACCTTTGGAAGTGG   |                                                                           |
| BD-P55F      | ATGGCCATGGAGGCCGAATTCATGGCACCTCCTCCAGCC           | construction of BD- <i>P55</i> (pGBKT7)                                   |
| BD-P55R      | CCGCTGCAGGTCGACGGATCCCTAGGGGCCAGCTCGTC            |                                                                           |
| AD-P55F      | GCCATGGAGGCCAGTGAATTCATGGCACCTCCTCCAGCC           | construction of AD- <i>P55</i> (pGADT7)                                   |
| AD-P55R      | CAGCTCGAGCTCGATGGATCCCTAGGGGCCAGCTCGTC            |                                                                           |
| AD-SIN3F     | GCCATGGAGGCCAGTGAATTCATGAATTCCTCAACGGTCCCACG      | construction of AD- <i>SIN3</i> (pGADT7)                                  |
| AD-SIN3R     | CAGCTCGAGCTCGATGGATCCTTATGCAGAAGCCAGCACC          |                                                                           |
| AD-SAP18F    | GCCATGGAGGCCAGTGAATTCATGATGGAGATGGACAGGAACG       | construction of AD- <i>SAP18</i> (pGADT7)                                 |
| AD-SAP18R    | CAGCTCGAGCTCGATGGATCCTCAGGGGTAATTCGCCGAT          |                                                                           |
| AD-SAP30F    | GCCATGGAGGCCAGTGAATTCATGCCACCAGCAAAGCAGC          | construction of AD- <i>SAP30</i> (pGADT7)                                 |
| AD-SAP30R    | CAGCTCGAGCTCGATGGATCCTCAGTCTTCTCGGTGTTCTCG        |                                                                           |
| AD-SIN3bpF   | GCCATGGAGGCCAGTGAATTCATGGCAACCATGGCAACTGCTAC      | construction of AD- <i>SIN3bp</i> (pGADT7)                                |
| AD-SIN3bpR   | CAGCTCGAGCTCGATGGATCCTTATACAGAGCCGAGTTGAAGTAGAGC  |                                                                           |
| AD-HOS2F     | GCCATGGAGGCCAGTGAATTCATGGATGCAGACTACACAGATATCG    | construction of AD- <i>HOS2</i> (pGADT7)                                  |
| AD-HOS2R     | CAGCTCGAGCTCGATGGATCCTTAAAATCCATGGCTTGACCAAC      |                                                                           |

Table S3. Strains used in this study.

| <b>Strain</b>              | <b>Genotype description</b>                                 |
|----------------------------|-------------------------------------------------------------|
| B157                       | Wild-type                                                   |
| $\Delta kmt6$              | deletion mutant of <i>MGG_00152</i> in B157                 |
| $\Delta kmt6$ -C           | expressing <i>KMT6-GFP</i> in $\Delta kmt6$ transformant    |
| $\Delta suz12$             | deletion mutant of <i>MGG_03169</i> in B157                 |
| $\Delta suz12$ -C          | expressing <i>SUZ12-GFP</i> in $\Delta suz12$ transformant  |
| $\Delta eed$               | deletion mutant of <i>MGG_06028</i> in B157                 |
| $\Delta eed$ -C            | expressing <i>EED-GFP</i> in $\Delta eed$ transformant      |
| $\Delta p55$               | deletion mutant of <i>MGG_07323</i> in B157                 |
| $\Delta p55$ -C            | expressing <i>P55-GFP</i> in $\Delta p55$ transformant      |
| $\Delta sin3$              | deletion mutant of <i>MGG_13498</i> in B157                 |
| $\Delta sin3$ -C           | expressing <i>SIN3-GFP</i> in $\Delta sin3$ transformant    |
| $\Delta sap18$             | deletion mutant of <i>MGG_05680</i> in B157                 |
| $\Delta sap30$             | deletion mutant of <i>MGG_11142</i> in B157                 |
| $\Delta sin3bp$            | deletion mutant of <i>MGG_10153</i> in B157                 |
| $\Delta hos2$              | deletion mutant of <i>MGG_01633</i> in B157                 |
| <i>P55-FLAG</i>            | <i>pRP27-P55-FLAG</i> in $\Delta p55$ transformant          |
| <i>SUZ12-FLAG</i>          | <i>pRP27-SUZ12-FLAG</i> in $\Delta suz12$ transformant      |
| <i>KMT6-FLAG</i>           | <i>pRP27-KMT6-FLAG</i> in $\Delta kmt6$ transformant        |
| <i>SIN3-FLAG</i>           | <i>pRP27-SIN3-FLAG</i> in $\Delta sin3$ transformant        |
| <i>EED-FLAG</i>            | <i>pRP27-EED-FLAG</i> in $\Delta eed$ transformant          |
| <i>SAP18-FLAG</i>          | <i>pRP27-SAP18-FLAG</i> in $\Delta sap18$ transformant      |
| <i>HOS2-FLAG</i>           | <i>pRP27-HOS2-FLAG</i> in $\Delta hos2$ transformant        |
| <i>SUZ12-GFP/KMT6-FLAG</i> | <i>pRP27-P55-FLAG</i> in <i>KMT6-FLAG</i> transformant      |
| <i>P55-GFP/KMT6-FLAG</i>   | expressing <i>P55-GFP</i> in <i>KMT6-FLAG</i> transformant  |
| <i>P55-GFP/SUZ12-FLAG</i>  | expressing <i>P55-GFP</i> in <i>SUZ12-FLAG</i> transformant |
| <i>P55-GFP/EED-FLAG</i>    | expressing <i>P55-GFP</i> in <i>EED-FLAG</i> transformant   |
| <i>P55-GFP/SIN3-FLAG</i>   | expressing <i>P55-GFP</i> in <i>SIN3-FLAG</i> transformant  |
| <i>P55-GFP/SAP18-FLAG</i>  | expressing <i>P55-GFP</i> in <i>SAP18-FLAG</i> transformant |
| <i>P55-GFP/HOS2-FLAG</i>   | expressing <i>P55-GFP</i> in <i>HOS2-FLAG</i> transformant  |
| Guy11                      | Wild-type                                                   |
| $\Delta kmt6$ (Guy11)      | deletion mutant of <i>MGG_00152</i> in Guy11                |
